# Molecular basis of outer kinetochore assembly on CENP-T

Pim J. Huis in 't Veld<sup>1,\*</sup>, Sadasivam Jeganathan<sup>1,‡,\*</sup>, Arsen Petrovic<sup>1</sup>, Juliane John<sup>1</sup>,  
Priyanka Singh<sup>1</sup>, Florian Weissmann<sup>2</sup>, Tanja Bange<sup>1</sup> & Andrea Musacchio<sup>1,3</sup>

<sup>1</sup> Department of Mechanistic Cell Biology, Max Planck Institute of Molecular Physiology,  
Otto-Hahn-Straße 11, 44227 Dortmund, Germany

<sup>2</sup> Research Institute of Molecular Pathology (IMP), Vienna, Austria

<sup>3</sup> Centre for Medical Biotechnology, Faculty of Biology, University Duisburg-Essen,  
Universitätsstrasse, 45141 Essen, Germany

## Additional Title Page Footnotes:

\* co-first author

‡ Present address: Chemical Genomics Centre of the Max Planck Society, Otto-Hahn-Str.  
15, 44227 Dortmund

**Correspondence:** [andrea.musacchio@mpi-dortmund.mpg.de](mailto:andrea.musacchio@mpi-dortmund.mpg.de)

**Keywords:** kinetochore, centromere, chromosome segregation, mitosis, cell cycle, microtubules, mitotic kinases, constitutive centromere associated network, CCAN, MIS12 complex, MIS12, Nsl1, Pmf1, Dsn1, NDC80 complex, NDC80, NUF2, SPC24, SPC25, CENP-C, CENP-T, CENP-W, CENP-S, CENP-X

1 Stable kinetochore-microtubule attachment is essential for cell division. It  
2 requires recruitment of outer kinetochore microtubule binders by centromere  
3 proteins C and T (CENP-C and CENP-T). To study the molecular requirements  
4 of kinetochore formation, we reconstituted the binding of the MIS12 and NDC80  
5 outer kinetochore subcomplexes to CENP-C and CENP-T. Whereas CENP-C  
6 recruits a single MIS12:NDC80 complex, we show here that CENP-T binds one  
7 MIS12:NDC80 and two NDC80 complexes upon phosphorylation by the mitotic  
8 CDK1:Cyclin B complex at three distinct CENP-T sites. Visualization of  
9 reconstituted complexes by electron microscopy supports this model. Binding of  
10 CENP-C and CENP-T to MIS12 is competitive, and therefore CENP-C and  
11 CENP-T act in parallel to recruit two MIS12 and up to four NDC80 complexes.  
12 Our observations provide a molecular explanation for the stoichiometry of  
13 kinetochore components and its cell cycle regulation, and highlight how outer  
14 kinetochore modules bridge distances of well over 100 nm.

16

## Introduction

18 Accurate chromosome segregation in eukaryotes requires the coordinated action of  
19 hundreds of proteins. Subsets of these assemble on centromeric chromatin that is  
20 epigenetically specified by the enrichment of centromeric protein A (CENP-A), a variant  
21 of Histone H3 (Guse et al., 2011). These assemblies, named kinetochores, form the  
22 major point of attachment between centromeres and the mitotic or meiotic spindle and  
23 couple the force of depolymerizing microtubules to chromosome movement  
24 (Cheeseman, 2014). Kinetochores also function as signaling platforms for the spindle  
25 assembly checkpoint and delay the onset of chromosome segregation in the presence of  
26 erroneous chromosome-spindle attachments (Musacchio, 2015).

The affinity of the kinetochore for microtubules is predominantly mediated by the  
28 NDC80 complex (NDC80C), a heterotetramer with an approximately 50 nm long coiled  
29 coil region that separates the microtubule-binding calponin homology (CH) domains of  
30 the NDC80 and NUF2 subunits from the SPC24 and SPC25 subunits (Ciferri et al.,  
31 2005; Ciferri et al., 2008; Wei et al., 2007; Wei et al., 2005). NDC80C is essential to form  
32 stable regulated kinetochore-microtubule interactions and its localization at the outer  
33 kinetochore is thus a prerequisite for faithful chromosome segregation (Cheeseman et al.,  
34 2006; DeLuca et al., 2005; DeLuca et al., 2006). The recruitment of NDC80C requires

the inner kinetochore proteins CENP-C and CENP-T (Carroll et al., 2010; Gascoigne et al., 2011; Hori et al., 2013; Kwon et al., 2007; Liu et al., 2006; Okada et al., 2006) as well as nuclear envelope breakdown and the activity of mitotic kinases (Gascoigne and Cheeseman, 2013).

Together with a set of other proteins, CENP-C and CENP-T are part of a larger protein complex at the inner kinetochore, also known as the constitutive centromere associated network (CCAN). Whereas CENP-C directly binds to CENP-A containing nucleosomes (Carroll et al., 2010) and has been proposed to act as a blueprint for further kinetochore assembly (Klare et al., 2015), CENP-T is integrated in a CENP-TWSX complex that requires its DNA-binding activity (Hori et al., 2008; Nishino et al., 2012), as well as interactions with the CCAN (Basilico et al., 2014; Carroll et al., 2010; Logsdon et al., 2015; Pekgoz Altunkaya et al., 2016; Samejima et al., 2015; Suzuki et al., 2015), to localize to the kinetochore.

Depletions of CENP-C or CENP-T, or prevention of cyclin-dependent kinase (CDK) phosphorylation of CENP-T all affect proper recruitment of MIS12C and NDC80C to the kinetochore (Gascoigne and Cheeseman, 2013; Gascoigne et al., 2011; Hori et al., 2013; Kim and Yu, 2015; Rago et al., 2015; Suzuki et al., 2015). Studying the respective contribution of CENP-C and CENP-T to outer kinetochore assembly, however, has been complicated by their interdependent localization and their distinct regulation by post-translational modifications. Experiments that targeted either CENP-C or CENP-T to an ectopic chromatin array uncoupled these requirements and demonstrated the ability of both pathways to recruit outer kinetochore components (Gascoigne et al., 2011). An important conclusion from these previous studies is that CENP-C and CENP-T recruit NDC80C in distinct ways (**Figure 1A**). The CENP-C-dependent axis, which is now understood in detail, relies on a direct interaction of CENP-C with the MIS12 complex (MIS12C) (Przewłoka et al., 2011; Screpanti et al., 2011), which further recruits NDC80C via a direct interaction (Cheeseman et al., 2006; Petrovic et al., 2010).

The CENP-T-dependent pathway, on the other hand, remains less well characterized. It is firmly established that CENP-T interacts directly with NDC80C, with (humans and chicken) or without (budding yeast) prior phosphorylation by CDK1:Cyclin B of sequence motifs in the CENP-T N-terminal region (Gascoigne et al., 2011; Malvezzi et al., 2013; Nishino et al., 2013; Schleiffer et al., 2012). Complicating the picture, however, CENP-T also contributes to kinetochore recruitment of MIS12C (Kim

and Yu, 2015; Rago et al., 2015). This may appear surprising, because MIS12C and  
70 CENP-T bind to NDC80C in a competitive manner (Nishino et al., 2013; Schleiffer et  
al., 2012), suggesting that they can only recruit NDC80C independently from each other.  
72 Whether the interaction of CENP-T with MIS12C is direct, and compatible with CENP-  
T binding to NDC80C, is therefore currently unclear.

74 The ability of kinetochores to form multiple low-affinity linkages with  
microtubules is at the basis of popular models of kinetochore-microtubule attachment  
76 such as the Hill's sleeve (Hill, 1985). It is also plausible that crucial regulatory aspects of  
kinetochore-microtubule attachment, such as the tension-dependent regulation required  
78 for correcting erroneous attachments or for stabilization of correct ones, depend on the  
effective number and distribution of linkages, as recently proposed in elegant modeling  
80 studies (Zaytsev et al., 2014). A detailed understanding of the stoichiometry of outer  
kinetochore composition and of its regulation is therefore crucial.

82 To address this question, we have embarked in an effort of biochemical  
reconstitution of kinetochores. This recently allowed us to report that the CENP-A  
84 nucleosome recruits two copies of the CCAN complex (Weir et al., 2016). In this study,  
we address instead the composition and regulation of the interactions between CCAN  
86 and the outer kinetochore, focusing on the interactions of CENP-T, MIS12C, and  
NDC80C. *In vitro* CDK1:Cyclin B phosphorylation reactions with systematically mutated  
88 CENP-T substrates revealed that the phosphorylation of CENP-T at Thr11 and Thr85  
results in the recruitment of two NDC80Cs. We also demonstrate that CENP-T  
90 phosphorylated at Ser201 directly binds MIS12C:NDC80C. Our electron microscopy  
analysis demonstrates unequivocally that CENP-T binds one MIS12C and up to three  
92 NDC80Cs. Furthermore, we show that CENP-C and CENP-T are competitive MIS12C  
binders. Thus, we have reconstituted and visualized the molecular basis of CENP-T  
94 mediated assembly of the outer kinetochore and its phospho-regulation.

## Results

### 96 Phosphorylation of CENP-T at T11 or T85 is sufficient to recruit SPC24:SPC25

To obtain insight into the molecular mechanism of CENP-T mediated recruitment of the  
98 human outer kinetochore, we set out to reconstitute this process using purified  
components. Previous studies identified multiple phosphorylation sites in CENP-T and  
100 showed that its phosphorylation contributes to the recruitment of NDC80C (Gascoigne  
and Cheeseman, 2013; Gascoigne et al., 2011; Kettenbach et al., 2011; Nishino et al.,  
102 2013; Rago et al., 2015). Confirming this, we identified numerous residues in CENP-T by  
mass spectrometry that were *in vitro* phosphorylated by CDK1:Cyclin B (**Table 1**). This  
104 included the CDK target sites Thr11, Thr27, Ser47, and Thr85 in the N-terminal region  
of CENP-T, which binds to the SPC24:SPC25 subunits of NDC80C (Malvezzi et al.,  
106 2013; Nishino et al., 2013) (**Figure 1B**). We obtained four short synthetic peptides that  
include phosphorylated forms of these residues and tested their binding with  
108 SPC24:SPC25 using isothermal titration calorimetry experiments. Peptides containing  
phosphorylated T11 or T85 showed a binding affinity of 45  $\mu$ M and 4  $\mu$ M respectively  
110 whereas peptides containing phosphorylated T27 or S47 did not show an interaction with  
SPC24:SPC25 (**Figure 1C**). Although the determined affinities are modest and unlikely  
112 to be representative for the binding affinities between full-length CENP-T and  
SPC24:SPC25, they distinguish *bona fide* binding sites from sites that do not interact.

114 Confirming these equilibrium binding experiments, the interaction between an  
N-terminal fragment of purified CENP-T and SPC24:SPC25 depended on the  
116 phosphorylation of CENP-T by CDK1:Cyclin B (**Figure 1D** and **Figure 1 - figure  
supplement 1**). We next generated a set of CENP-T<sup>2-101</sup> constructs in which three out of  
118 the four CDK phosphorylation sites were mutated to Alanine and found that fragments  
retaining either Thr11 or Thr85 bound to SPC24:SPC25 in a phosphorylation dependent  
120 manner, whereas fragments retaining either Thr27 or Ser47, or having all four sites  
mutated to Alanine, did not bind SPC24:SPC25 (**Figure 1D** and **Figure 1 - figure  
supplement 1**). Phosphorylation of CENP-T at T11 or T85 is thus sufficient to bind  
122 SPC24:SPC25. These results are consistent with *in vivo* experiments showing that ectopic  
chromosome anchoring of a CENP-T<sup>1-250</sup> fragment results in the recruitment of  
124 NDC80C when either Thr11 or Thr85 were mutated to Alanine, but not when both were  
126 mutated (Rago et al., 2015).

## 128 CENP-T coordinates two NDC80 complexes in a single complex

The finding that phosphorylation of CENP-T at either Thr11 or Thr85 is sufficient to  
130 recruit SPC24:SPC25, both *in vivo* (Rago et al., 2015) and *in vitro* (**Figure 1**), raises the  
question whether phosphorylated CENP-T can bind two SPC24:SPC25 units  
132 simultaneously. This possibility is supported by the change in retention volume and the  
apparent stoichiometry of the CENP-T<sup>2-101</sup>:SPC24:SPC25 complex (**Figure 1D**). We set  
134 out to test the stoichiometry of CENP-T:SPC24:SPC25 complexes further using a  
CENP-T<sup>2-373</sup> fragment that we C-terminally labeled with a fluorescent dye to specifically  
136 follow CENP-T during chromatography and SDS-PAGE (**Figure 2**). This is helpful  
because CENP-T<sup>2-373</sup>, which lacks Tryptophan and has only one Tyrosine, absorbs poorly  
138 at 280 nm. Fluorescently labeled CENP-T<sup>2-373</sup> (hereafter CENP-T) was *in vitro*  
phosphorylated by CDK1:Cyclin B and subsequently incubated with a threefold molar  
140 excess of SPC24:SPC25. CENP-T was part of a broad peak with two SPC24:SPC25-  
containing species with approximate retention volumes of 1.2 and 1.35 ml (**Figure 2**,  
142 green traces). Consistent with the idea that the complex eluting at 1.2 mL contained two  
SPC24:SPC25 molecules per CENP-T, this species was not observed for CENP-T  
144 containing the T11A or the T85A mutation (**Figure 2**, orange traces). CENP-T that was  
mutated at both T11 and T85 or that was not phosphorylated, did not form a complex  
146 with SPC24:SPC25 (**Figure 2**, red and black traces).

Using a similar experimental setup, we determined that CENP-T also binds full-  
148 length NDC80Cs in a manner that depends on the phosphorylation of T11 and T85  
(**Figure 3A** and **Figure 3 - figure supplement 1**). We next set out to visualize these  
150 assemblies directly by electron microscopy (EM) after low-angle metal shadowing. This  
technique enhances the contrast of the thin coiled-coil regions of NDC80C, enabling a  
152 characterization of the overall dimensions of complexes containing NDC80C. We  
inspected a number of NDC80Cs in detail ( $n=150$ ). The coiled-coil of NDC80C spans  
154 51 nm and the NDC80:NUF2 - SPC24:SPC25 end-to-end length is 62 nm (corrected for  
an estimated 3 nm shadow contribution at both ends) (**Figure 3B** and **Figure 3 - figure**  
156 **supplement 2**). This is slightly longer than the 57 nm of yeast NDC80C previously  
determined using the same technique (Wei et al., 2005). The difference might be  
158 explained by the use of full-length human NDC80C whereas the used yeast version  
lacked the N-terminal 100 residues of the NDC80p subunit, although interspecies or  
160 technical differences cannot be excluded. The low-resolution and the flexible appearance  
of the NDC80C prevent unambiguous assignment of the SPC24:SPC25 and the

162 NDC80:NUF2 modules of the complexes, although a clear kink in the coiled coil,  
previously attributed to a sequence insertion in NDC80 (Ciferri et al., 2008) marks  
164 NDC80:NUF2 in a number of cases (**Figure 3B** and **Figure 3 - figure supplement 2**).

Metal-shadowed particles from an early eluting size exclusion chromatography  
166 (SEC) fraction of the CENP-T:NDC80C mixture had a more heterogeneous appearance  
than NDC80C in isolation (**Figure 3B** and **Figure 3 - figure supplements 3 and 4**).  
168 We were able to distinguish at least two different kinds of complexes, containing either  
one or two NDC80Cs. Though it is not possible to ascertain if complexes with one  
170 discernible NDC80 contain CENP-T, those containing two NDC80Cs are presumably  
assembled on phosphorylated CENP-T. This interpretation is further supported by the  
172 distance between the base of the complexes and the characteristic kinks in the coiled coil  
of NDC80:NUF2 (**Figure 3B** and **Figure 3 - figure supplement 4**). The apparent  
174 orientation of the two CENP-T-bound NDC80Cs widely varies, presumably because the  
CENP-T<sup>11-85</sup> stretch between the two NDC80C binding sites is flexible. In brief, we  
176 visualized how CENP-T recruits two NDC80Cs. The SPC24:SPC25 modules of these  
complexes are coordinated by the relative proximity of the phosphorylated T11 and T85  
178 of CENP-T, but the microtubule-binding CH domains can be well over 100 nm apart.

### 180 **CENP-T phosphorylated at S201 stoichiometrically binds the MIS12 complex**

It had previously been shown that MIS12C and CENP-T bind SPC24:SPC25 in a  
182 competitive manner (Nishino et al., 2013; Schleiffer et al., 2012). Consistent with these  
previous reports, we find that MIS12C binds SPC24:SPC25, displacing CENP-T<sup>2-101</sup>,  
184 already at equimolar concentrations, indicative of higher binding affinity (unpublished  
data). However, a similar experiment with the longer CENP-T<sup>2-373</sup> fragment resulted in  
186 binding between MIS12C and phosphorylated CENP-T. This interaction also occurs in  
the absence of SPC24:SPC25 and strictly depends on the phosphorylation of CENP-T  
188 (**Figure 4A** and **Figure 4 - figure supplement 1**, green vs. black traces). Systematic  
mutational analysis of CENP-T phosphorylation sites (**Table 1**) revealed that the CENP-  
190 T:MIS12C interaction strictly depends on the phosphorylation of residue S201 of CENP-  
T (unpublished data and **Figure 4A**, green vs. blue traces). Mutation of the phospho-  
192 targets T11 and T85 did not affect the binding between CENP-T and MIS12C (**Figure**  
**4A**, red trace).

194 CENP-T S201 has previously been identified as a mitotic CENP-T  
phosphorylation site (Kettenbach et al., 2011) and was effectively phosphorylated by  
196 CDK1:Cyclin B *in vitro* (**Table 1**), but is not a canonical CDK target site. Notably,  
phosphorylation of the proximal Thr195, a canonical CDK site that is also  
198 phosphorylated *in vitro* (**Table 1**) and *in vivo* (Gascoigne et al., 2011; Kettenbach et al.,  
2011) and that has been shown to contribute to MIS12C recruitment to CENP-T *in vivo*  
200 (Rago et al., 2015), is not required for the direct interaction between CENP-T and  
MIS12C *in vitro* (**Figure 4 - figure supplement 2**).

202 We further characterized the interaction between CENP-T and MIS12C using  
sedimentation velocity analytical ultracentrifugation (SV-AUC) experiments. Both  
204 MIS12C and CENP-T sedimented with relatively high frictional ratios, consistent with  
their elongated shape and unstructured nature, respectively (**Figure 4B**). To analyze the  
206 sedimentation of the mixture between CENP-T and MIS12C, we specifically monitored  
absorbance of the fluorescently labeled CENP-T and thus analyzed sedimentation of  
208 CENP-T:MIS12C without following MIS12C. The CENP-T:MIS12C complex  
sedimented with a frictional ratio of 2.4S and a determined mass (159 kDa), in close  
210 agreement with the theoretical mass of a 1:1 complex (162 kDa, unphosphorylated)  
(**Figure 4B**).

212

### **CENP-T recruits one MIS12 complex and three NDC80 complexes**

214 To test directly if MIS12C that is bound to phosphorylated CENP-T retains its ability to  
bind NDC80C, we incubated different forms of CENP-T with MIS12C and a molar  
216 excess of NDC80C. Phosphorylated CENP-T integrated in large complexes that eluted  
earlier from the SEC column than MIS12:NDC80 complexes. Our set of CENP-T  
218 mutants was used to systematically unravel the complex nature of these CENP-  
T:MIS12C:NDC80C assemblies. In addition to recapitulating observations made for  
220 CENP-T:NDC80C (**Figure 3**) and CENP-T:MIS12C (**Figure 4**), this experiment  
showed that CENP-T with mutated NDC80C-binding motifs (T11A and T85A) still  
222 associated with MIS12C:NDC80C (**Figure 5A**, red trace). This association strictly  
depends on the phosphorylation of CENP-T at Ser201 because the CENP-T triple  
224 mutant (T11A, T85A, S201A) no longer formed a complex with MIS12C or NDC80C  
(**Figure 5A**, purple trace). Our analyses indicate the formation of assemblies in which  
226 CENP-T, MIS12C, and NDC80C are present in 1:1:3 (CENP-T<sup>w</sup>), 1:1:2 (CENP-T<sup>T11A</sup>)



and CENP-T<sup>T85A</sup>), and 1:1:1 (CENP-T<sup>T11A-T85A</sup>) ratios. The behavior of the complete set  
228 of CENP-T mutants upon incubation with MIS12C and/or NDC80C is displayed in  
**Figure 5 - figure supplement 1**).

230

### **Visualization of the outer kinetochore assembled on CENP-T**

232 To analyze the overall appearance of CENP-T:MIS12C:NDC80C complexes by electron  
microscopy, we incubated isolated CENP-T:MIS12C complexes with a molar excess of  
234 NDC80C. The mixture was separated by SEC (**Figure 3 - figure supplement 3**) and  
both a high-molecular weight fraction and a later-eluting fraction were inspected by EM  
236 after low-angle metal shadowing. As previously described for complexes that were  
analyzed by electron microscopy after negative staining (Petrovic et al., 2014; Petrovic et  
238 al., 2010; Screpanti et al., 2011), analysis of metal-shadowed MIS12C:NDC80C showed  
how MIS12C forms a rod-like 18 nm extension at the SPC24:SPC25 side of NDC80C  
240 (**Figure 5B** and **Figure 5 - figure supplement 2**). Consistent with our biochemical  
analysis, the direct visualization of CENP-T:MIS12C:NDC80C assemblies highlighted  
242 how CENP-T can coordinate MIS12C and a total of three NDC80Cs into a single  
complex (**Figure 5B** and **Figure 5 - figure supplement 3**). In a number of cases, the  
244 MIS12C:NDC80C module could be identified within the CENP-T:MIS12C:NDC80C  
assemblies. This enabled the distinction between NDC80C bound to CENP-T directly  
246 and NDC80C recruited via the CENP-T:MIS12C interaction. In those cases, the two  
NDC80Cs that are recruited to CENP-T phosphorylated at positions T11 and T85  
248 resemble the previously visualized CENP-T:NDC80C<sub>2</sub> complexes (**Figure 5B**, e.g.  
bottom right).

250 In a small number of cases, the core of MIS12C:CENP-T seems to be more  
complex, resulting in assemblies with more density in the middle and four, five, or six  
252 NDC80Cs at the periphery (**Figure 5 - figure supplement 3**). Whether this  
oligomerization represents a biologically relevant tendency of the outer kinetochore to  
254 multimerize remains to be tested. Consistent with the aforementioned sample  
heterogeneity, we also observed CENP-T:MIS12C:NDC80<sub>2</sub> assemblies (**Figure 5 -**  
256 **figure supplement 3**). These assemblies show one NDC80C that is directly recruited to  
phosphorylated CENP-T via Thr11 or Thr85 and one NDC80C that binds CENP-  
258 T:MIS12C. Assemblies with three NDC80Cs were also rare in the later eluting fraction of  
the same SEC run (**Figure 3 - figure supplement 3**).

260 **CENP-T and CENP-C are competitive binders of the MIS12 complex**

Our observation that CENP-T and MIS12C directly interact raises the possibility that the  
262 CENP-C- and CENP-T-mediated outer kinetochore recruitment pathways are integrated  
into a single CDK1:Cyclin B regulated pathway. However, when we incubated a  
264 preformed CENP-T:MIS12C complex with recombinant CENP-C, CENP-T was  
displaced from MIS12C and a CENP-C:MIS12C complex was formed (**Figure 6** and  
266 **Figure 6 - figure supplement 1**). This displacement strictly depended on the ability of  
CENP-C to bind MIS12C since the CENP-C<sup>K10A-Y13A</sup> mutant that is unable to bind  
268 MIS12C (Screpanti et al., 2011) did not disrupt the CENP-T:MIS12C complex (**Figure**  
**6**) whereas a shorter fragment of CENP-C, CENP-C<sup>1-71</sup>, that can bind MIS12C did  
270 (**Figure 6 - figure supplement 1**). Our *in vitro* studies thus demonstrate that MIS12C  
can be recruited to the kinetochore via CENP-C and via CENP-T that is phosphorylated  
272 at position S201. The competitive mode of binding suggests that CENP-C and CENP-T  
bind to the same site, or at least to partly overlapping sites, of MIS12C, in the latter case  
274 in a phosphorylation dependent manner.

## Discussion

276 Full assembly of the outer kinetochore is restricted to mitosis and is tightly regulated, but  
the molecular requirements for this regulation remain poorly understood. Here, we have  
278 reported a thorough dissection of the role of CENP-T in this process. Depletion of  
CENP-T almost completely abolishes the ultrastructure of the outer kinetochore (Hori et  
280 al., 2008) and phenocopies the effects of NDC80C depletion (DeLuca et al., 2005),  
showing the importance of CENP-T mediated recruitment of NDC80C to mitotic  
282 kinetochores. This role is further illustrated by the observation that CENP-T depletion  
lowers NDC80C levels at mitotic kinetochores more than CENP-C depletion  
284 (Gascoigne et al., 2011; Suzuki et al., 2015), and by experiments showing that  
replacement of the outer kinetochore binding domain of CENP-C with that of CENP-T  
286 supports chromosome segregation in cells depleted of CENP-C (Suzuki et al., 2015).

We reconstituted the assembly of outer kinetochore modules using purified  
288 components and determined how CDK-dependent phosphorylation of CENP-T  
controls the multivalency of NDC80C. The analysis of our synthetic outer kinetochores  
290 by SEC, SV-AUC, and EM revealed that one copy of CENP-T recruits two NDC80Cs  
via phosphorylated CENP-T<sup>T11</sup> and CENP-T<sup>T85</sup> and one MIS12C:NDC80C via  
292 phosphorylated CENP-T<sup>S201</sup>. Because the binding of CENP-C and CENP-T to MIS12C  
is competitive, these findings support a model in which CENP-C and CENP-T act in  
294 parallel to recruit two MIS12Cs and up to four NDC80Cs in a CDK-regulated manner  
(**Figure 7**).

296 Our finding that phosphorylated CENP-T can form a 1:1 complex with MIS12C  
is consistent with a series of *in vivo* studies that showed that CENP-T does not only bring  
298 NDC80C to the outer kinetochore, but is also involved in the recruitment of MIS12C  
(Gascoigne and Cheeseman, 2013; Gascoigne et al., 2011; Hori et al., 2013; Kim and Yu,  
300 2015; Rago et al., 2015; Suzuki et al., 2015). The molecular mechanism behind the  
contribution of CENP-T to MIS12C localization at the kinetochore, however, had  
302 remained unclear, and it appeared confusing in view of observations that MIS12C and  
CENP-T bind to NDC80C in a competitive manner (Nishino et al., 2013; Schleiffer et  
304 al., 2012). A role for the CENP-T<sup>200-230</sup> region in MIS12C recruitment was shown in  
experiments using the ectopic chromatin targeting of CENP-T fragments that revealed  
306 that MIS12C was recruited to CENP-T<sup>1-230</sup> but not to CENP-T<sup>1-200</sup> (Rago et al., 2015).  
Our observation that the phosphorylation of S201 is essential for the CENP-T:MIS12C

308 interaction *in vitro* explains these previous observations (**Figure 4**). Interestingly,  
phosphorylation of the CDK consensus site CENP-T T195 is important for the CENP-  
310 T:MIS12C interaction *in vivo* (Rago et al., 2015), but is not required *in vitro* (**Figure 4 -  
figure supplement 2**). A possible explanation for these results is that the  
312 phosphorylation of kinetochore-associated CENP-T at Thr195 is required for the  
phosphorylation of Ser201 and the subsequent binding of MIS12C. Multisite  
314 phosphorylation networks are important for the regulation of mitosis by CDK1 kinase  
(Koivomagi et al., 2011) and future experiment will be required to understand the spatial  
316 and temporal regulation of CENP-T phosphorylation *in vivo*.

Our reconstitution experiments provide a molecular explanation for the observed  
318 CDK-dependent recruitment of NDC80C to kinetochores (Gascoigne et al., 2011) and  
show how one CENP-T molecule can recruit one MIS12C and up to three NDC80Cs.  
320 Because the pseudo-symmetric nature of CENP-A nucleosomes results in the binding of  
two CCAN modules (Weir et al., 2016), we propose that mitotic phosphorylation events  
322 trigger the recruitment of four MIS12Cs and up to eight NDC80Cs per CENP-A  
mononucleosome (**Figure 7**). This extrapolation of our reconstitution experiments is in  
324 line with a series of quantitative analyses of kinetochore subcomplexes by  
immunofluorescence microscopy. Copy numbers of CENP-C, CENP-T, MIS12C, and  
326 NDC80C were most accurately determined for metaphase kinetochores in a study that  
combined RNA interference, ectopic and endogenous kinetochore recruitment, and an  
328 elegant CENP-C/T chimera protein design (Suzuki et al., 2015). This analysis revealed  
that, on average, 215 copies of CENP-C and 72 copies of CENP-T recruit a total of 244  
330 NDC80Cs and 151 MIS12Cs to a kinetochore. However, only 82 (of the 215) CENP-C  
proteins engage in binding MIS12C, whereas the remaining CENP-C does not contribute  
332 to outer kinetochore recruitment. CENP-T is responsible for the recruitment of the  
remaining MIS12Cs and NDC80Cs (Suzuki et al., 2015). These results correlate well to  
334 our description of 1:1:1 CENP-C:MIS12C:NDC80C and 1:1:2 or 1:1:3 CENP-  
T:MIS12C:NDC80C assemblies.

336 As stated in the introduction, NDC80C multivalency may have profound  
implications for microtubule binding (Hill, 1985; Zaytsev et al., 2014). Our study paves  
338 the way to the reconstitution of synthetic kinetochores with controllable numbers of  
NDC80 complexes, which will in turn allow us to probe the importance of multivalency  
340 for force production by kinetochores. Whether the CDK-regulated NDC80C  
multivalency at the outer kinetochore has an effect on the function of kinetochores to

342 signal the microtubule-attachment state through spindle checkpoint control also remains  
to be addressed. In this perspective, it is interesting to note that NDC80C recruited by  
344 CENP-C:MIS12C or by CENP-T have been proposed to have different effects on the  
checkpoint response (Kim and Yu, 2015; Samejima et al., 2015).

346 The visualization of the reconstituted 1:1:3 CENP-T:MIS12C:NDC80C  
complexes by electron microscopy after low-angle metal shadowing highlighted how  
348 outer kinetochores assembled on phosphorylated CENP-T can span distances of well  
over 100 nm. It also showed the varying orientation of the coordinated NDC80Cs  
350 relative to each other, presumably caused by the flexibility of the CENP-T regions in  
between the NDC80C and MIS12C binding sites. The flexibility of CENP-T as well as  
352 the stretching of CENP-T upon kinetochore-microtubule contacts has been shown  
before: the N- and C-termini of tagged CENP-T were ~30 nm apart in the presence of  
354 tension (MG132 treated cells) but only ~4 nm apart in the absence of tension  
(nocodazole treated cells), as determined by immunofluorescence and immuno-electron  
356 microscopy (Suzuki et al., 2011). Moreover, the N-terminal tail of CENP-T was seen as a  
25 ± 13 nm long flexible extension of the CENP-T<sub>W</sub> histone-fold domain by high speed  
358 atomic force microscopy (Suzuki et al., 2011).

The likely interpretation of these results is that the intrinsically flexible N-  
360 terminal region of CENP-T stretches when the multiple NDC80Cs it coordinates bind  
microtubules, while its C-terminal HFD remains anchored at the inner kinetochore. In  
362 the future, it will be important to test how the observed CENP-T:MIS12C:NDC80C<sub>3</sub>  
complexes structurally rearrange in the presence of microtubules and if the presence of  
364 multiple NDC80Cs contributes to stabilization of the kinetochore-microtubule interface  
observed in the presence of tension (Akiyoshi et al., 2010; Nicklas and Koch, 1969). Low  
366 affinity, cooperative interactions might acquire the highest relevance under these  
conditions, and biochemical reconstitution is a powerful means to identify them and  
368 address their possible importance.

## Experimental Procedures

### 370 Protein expression and purification

cDNAs encoding GST-CENP-T<sup>2-101</sup> and GST-CENP-T<sup>2-373</sup> with a C-terminal -LPETGG  
372 extension were subcloned into pGEX-6P-2rbs, a dicistronic derivative of pGEX6P,  
generated in house. Point mutations were introduced by PCR and all plasmids were  
374 verified by DNA sequencing. *E. coli* BL21(DE3)-Codon-plus-RIL cells containing the  
CENP-T encoding pGEX-6P-2rbs vector were grown at 37°C in Terrific Broth in the  
376 presence of Chloramphenicol and Ampicillin to an OD<sub>600</sub> of ~0.8. Protein expression  
was induced by the addition of 0.35 mM IPTG and cells were incubated ~14 hours at  
378 20°C. All following steps were performed on ice or at 4°C. Cell pellets were resuspended  
in buffer A (20 mM Tris-HCl, pH 8.0, 300 mM NaCl, 10% (v/v) glycerol and 1 mM  
380 TCEP) supplemented with 0.5 mM PMSF, protease-inhibitor mix HP Plus (Serva) and  
DNaseI (Roche), lysed by sonication and cleared by centrifugation at 108,000g for 30  
382 minutes. The cleared lysate was applied to a 5 ml GSTrap FF column (GE Healthcare)  
equilibrated in buffer A. The column was washed with approximately 50 column  
384 volumes of buffer A and bound protein was eluted in buffer A by cleavage of the GST-  
tag with PreScission protease for ~14 hours. The eluate was diluted 10-fold with buffer  
386 B (20 mM Tris-HCl pH 6.8, 1 mM TCEP) and applied to a 5 ml HiTrap Heparin HP  
column (GE Healthcare) pre-equilibrated in buffer B with 25 mM NaCl. Bound protein  
388 was eluted in buffer B using a linear gradient from 25 mM to 800 mM NaCl in 16  
column volumes. Selected fractions were concentrated (Amicon; 10 kDa molecular  
390 weight cut-off) and either used for Sortase-mediated labeling (see below) or directly  
applied to an equilibrated Superdex 200 10/300 SEC column (GE Healthcare). SEC was  
392 performed with a 20 mM Tris-HCl, pH 8.0, 150 mM NaCl, and 1 mM TCEP mobile  
phase at a flow rate of 0.4 ml/min, and the relevant fractions were pooled, concentrated,  
394 flash-frozen in liquid nitrogen, and stored at -80 °C.

The four full-length components of the NDC80 complex (NDC80C; SPC25<sup>6xHis</sup>)  
396 were combined on a pFL (Fitzgerald et al., 2006) or a pBIG1 (Weissmann et al., 2016)  
vector. Baculoviruses were generated in Sf9 insect cells and used for protein expression  
398 in Tnao38 insect cells (Hashimoto et al., 2010). Between 60 and 72 hours post-infection,  
cells were pelleted, washed in PBS, pelleted, and stored at -80 °C until use. Cells were  
400 thawed and resuspended in buffer A (50 mM Hepes, pH 8.0, 200 mM NaCl, 5% v/v  
glycerol, 1 mM TCEP) supplemented with 20 mM imidazole, 0.5 mM PMSF, and

402 protease-inhibitor mix HP Plus (Serva), lysed by sonication and cleared by centrifugation  
at 108,000g for 30 minutes. The cleared lysate was filtered (0.8  $\mu$ M) and applied to a 5 ml  
404 HisTrap FF (GE Healthcare) equilibrated in buffer A with 20 mM imidazole. The  
column was washed with approximately 50 column volumes of buffer A with 20 mM  
406 imidazole and bound proteins were eluted in buffer A with 300 mM imidazole. Relevant  
fractions were pooled, diluted 5-fold with buffer A with 25 mM NaCl and applied to a 6  
408 ml ResourceQ column (GE Healthcare) equilibrated in the same buffer. Elution of  
bound protein was achieved by a linear gradient from 25 mM to 400 mM NaCl in 30  
410 column volumes. Relevant fractions were concentrated in 30 kDa molecular mass cut-off  
Amicon concentrators (Millipore) in the presence of an additional 200 mM NaCl and  
412 applied to a Superdex 200 10/300 or a Superose 6 10/300 column (GE Healthcare)  
equilibrated in size-exclusion chromatography buffer (50 mM Hepes, pH 8.0, 250 mM  
414 NaCl, 5% v/v glycerol, 1 mM TCEP). Size-exclusion chromatography was performed  
under isocratic conditions at recommended flow rates and the relevant fraction were  
416 pooled, concentrated, flash-frozen in liquid nitrogen, and stored at -80 °C. Expression  
and purification of the full-length MIS12 complex (MIS12C; Dsn1<sup>6His</sup>) was identical but  
418 size exclusion chromatography was performed in 50 mM Hepes, pH 8.0, 200 mM NaCl,  
1 mM and no additional NaCl was added before the concentration of the relevant  
420 fractions of the ion-exchange chromatography step.

SPC24:SPC25 (Ciferri et al., 2008), CENP-C<sup>1-71</sup> (Screpanti et al., 2011) and  
422 CENP-C<sup>2-545</sup> (Klare et al., 2015) were expressed and purified as described.

Codon-optimized CDK1 and Cyclin B1 constructs were obtained from GeneArt  
424 (Life Technologies) and combined in a pBIG1A vector (Weissmann et al., 2016) with N-  
terminal tags on CDK1 (GST) and Cyclin B1 (hexahistidine). GST-CDK1 and 6His-  
426 Cyclin B1 were co-expressed in Tnao38 insect cells as described above and purified using  
glutathione sepharose (GE Healthcare) followed by size exclusion chromatography using  
428 a HiLoad 16/60 Superdex 200 pg column (GE Healthcare) equilibrated in buffer  
containing 20 mM HEPES pH 7.5, 200 mM NaCl, 1 mM TCEP, and 5% glycerol.

430

### Sortase labeling

432 Purified *S. aureus* Sortase (Guimaraes et al., 2013) or the Sortase 5M mutant (Hirakawa et  
al., 2015) were used to label CENP-T<sup>2-373</sup>-LPETGG with GGGGK peptides with a C-  
434 terminally conjugated tetramethylrhodamine (TMR) or fluorescein amidite (FAM)

(Genscript). Labeling was performed for ~14 hours at 4°C in the presence of 10 mM  
436 CaCl<sub>2</sub> using molar ratios of Sortase, CENP-T, and peptide of approximately 1:20:200.  
CENP-T was separated from Sortase and the unreacted peptides by size exclusion  
438 chromatography as described above. Based on the absorbance at 280 nm and 495 nm  
(FAM) or 555 nm (TMR), a labeling efficiency of >90% was achieved. Sortase labeling of  
440 SPC24:SPC25 was performed in a similar manner.

#### 442 ***In vitro* phosphorylation of CENP-T**

CENP-T<sup>2-101</sup> fragments and CENP-T analyzed by mass spectrometry were *in vitro*  
444 phosphorylated by CDK1:Cyclin B (Millipore). In-house generated CDK1:CyclinB was  
used for all other *in vitro* phosphorylation experiments. Phosphorylation reactions were  
446 set up in size exclusion chromatography buffer (20 mM Tris-HCl pH 8, 150 mM NaCl,  
and 1 mM TCEP) containing 100 nM CDK1:Cyclin B, 10 μM CENP-T substrate, 2 mM  
448 ATP, and 10 mM MgCl<sub>2</sub>. Reaction mixtures were kept at 30°C for 30 minutes and then  
used in binding experiments.

450

#### **Mass spectrometry**

452 Liquid chromatography coupled with mass spectrometry was used to assess the  
phosphorylation status of *in vitro* phosphorylated CENP-T<sup>2-373</sup>. An unphosphorylated  
454 sample was processed in parallel and used as a control. Samples were reduced, alkylated  
and digested with GluC or LysC/Trypsin and prepared for mass spectrometry as  
456 previously described (Rappsilber et al., 2007). Obtained peptides were separated on an  
EASY-nLC 1000 HPLC system (Thermo Fisher Scientific, Odense, Denmark) using a 45  
458 min gradient from 5-60% acetonitrile with 0.1% formic acid and directly sprayed via a  
nano-electrospray source in a quadrupole Orbitrap mass spectrometer (Q Exactive,  
460 Thermo Fisher Scientific) (Michalski et al., 2011). The Q Exactive was operated in data-  
dependent mode acquiring one survey scan and subsequently ten MS/MS scans.  
462 Resulting raw files were processed with the MaxQuant software (version 1.5.2.18) using  
CENP-T<sup>2-373</sup> for the search with deamidation (NQ), oxidation (M) and phosphorylation  
464 (STY) as variable modifications and carbamidomethylation (C) as fixed modification. A  
false discovery rate cut off of 1% was applied at the peptide and protein levels and as  
466 well on the site decoy fraction (Cox and Mann, 2008).



### Analytical size exclusion chromatography

468 Proteins were mixed at the indicated concentrations, incubated on ice for at least one  
hour, spun for 15 minutes at 13,000 rpm at 4 °C, and then analyzed by size exclusion  
470 chromatography at 4 °C using a ÄKTAmicro system (GE Healthcare) mounted with a  
column (Superdex 200 5/150, Superdex 200 5/150 increase, Superose 6 5/150, or  
472 Superose 6 5/150) equilibrated in size exclusion chromatography buffer (20 mM Tris-  
HCl pH 8, 150 mM NaCl, and 1 mM TCEP) and operated at or near the recommended  
474 flow rate. Fractions of 50-100 µL were collected in 96-well plates and analyzed by SDS-  
PAGE. The absorbance of fluorescently labeled proteins was followed during  
476 chromatography using the ÄKTAmicro Monitor UV-900 (GE Healthcare) and after  
SDS-PAGE using a ChemiDoc MP system (Bio-Rad).

478

### Isothermal titration calorimetry

480 All samples were exchanged into fresh buffer (20 mM Tris-HCl, 150 mM NaCl and 1  
mM TCEP). ITC measurements were performed at 20 °C on an ITC200  
482 microcalorimeter (GE Healthcare). In each titration, the protein in the cell (at a 10 - 30  
µM concentration) was titrated with 25 x 4 µl injections (at 180 sec intervals) of protein  
484 ligand (at 10-fold higher molar concentration). The following synthetic peptides (purity >  
95 %, Genscript) were used Thr11 DST(p)PRTLLRRVLDTAYA, Thr85  
486 EQT(p)PRTLLKNILLTAYA, Thr27 PRT(p)PRRPRSARAGARYA, and Thr47  
TAS(p)PRKLSGQTRTIARYA. Injections were continued beyond saturation to allow  
488 for determination of heats of ligand dilution. Data were fitted by least-square procedure  
to a single-site binding model using ORIGIN software package (MicroCal).

490

### Analytical Ultracentrifugation

492 Sedimentation velocity AUC was performed at 42,000 rpm at 20°C in a Beckman XL-A  
ultracentrifuge. Purified protein samples were diluted to 15-30 µM in a buffer containing  
494 20 mM Tris-HCl, 150 mM NaCl and 1 mM TCEP and loaded into standard double-  
sector centerpieces. The cells were scanned at 280 nm or 555 nm every minute and 500  
496 scans were recorded for every sample. Data were analyzed using the program SEDFIT  
(Schuck, 2000) with the model of continuous  $c(s)$  distribution. The partial specific

498 volumes of the proteins, buffer density and buffer viscosity were estimated using the  
program SEDNTERP. Data figures were generated using the program GUSI.

500

#### **Low-angle metal shadowing and electron microscopy**

502 Fractions from an analytical size exclusion chromatography column were diluted 1:1 with  
spraying buffer (200 mM ammonium acetate and 60% glycerol) and air-sprayed as  
504 described (Baschong and Aebi, 2006) onto freshly cleaved mica (V1 quality, Plano  
GmbH) of approximately 2x3 mm. Specimens were mounted in a MED020 high-  
506 vacuum metal coater (Bal-tec) and dried for ~14 hours. A Platinum layer of  
approximately 1 nm and a 7 nm Carbon support layer were subsequently evaporated  
508 onto the rotating specimen at angles of 6-7° and 45° respectively. Pt/C replicas were  
released from the mica on water, captured by freshly glow-discharged 400-mesh Pd/Cu  
510 grids (Plano GmbH), and visualized using a LaB<sub>6</sub> equipped JEM-400 transmission  
electron microscope (JEOL) operated at 120 kV. Images were recorded at a nominal  
512 magnification of 60,000x on a 4k X 4k CCD camera F416 (TVIPS), resulting in 0.1890  
nm per pixel. Particles were manually selected using EMAN2 (Tang et al., 2007) and  
514 further analyzed using Fiji (Schindelin et al., 2012).

### **Author contributions**

516 P.J.H., S.J., A.P., J.J., and A.M. designed, performed, and interpreted experiments. S.J.,  
P.J.H., J.J., A.P., and P.S. purified proteins. P.J.H., S.J., and J.J. performed analytical size-  
518 exclusion chromatography. P.J.H. performed low-angle metal shadowing and electron  
microscopy. A.P. and J.J. performed analytical ultracentrifugation. A.P. and S.J.  
520 performed isothermal titration calorimetry. F.W. contributed novel reagents. T.B.  
performed mass spectrometry. P.J.H. and A.M. prepared figures and wrote the  
522 manuscript with input from all authors.

524

### **Acknowledgements**

526 We are grateful to S. Wohlgemuth and I. Stender for NDC80C and MIS12C purifications  
and to O. Hofnagel and F. Müller for assistance with electron microscopy and mass  
528 spectrometry. We thank J.-M. Peters for sharing unpublished reagents and acknowledge  
S. van Gerwen, J. Keller, K. Klare, V. Krenn, A. Maiolica, S. Mosalaganti, A. Schleiffer,  
530 and F. Villa, as well as all members of the Musacchio laboratory for support, ideas, and  
discussion. S.J. acknowledges support of a Marie Curie Mobility Fellowship, SEMM's  
532 Structured International Post Doc program (SIPOD) and an EMBO long-term  
fellowship (ALTF 262-2009). A.M. acknowledges funding by the European Union's 7th  
534 Framework Program ERC advanced grant agreement RECEPIANCE and the DFG's  
Collaborative Research Centre (CRC) 1093. The authors declare no competing financial  
536 interests.

## References

538

- 540 1) Akiyoshi, B., Sarangapani, K.K., Powers, A.F., Nelson, C.R., Reichow, S.L., Arellano-  
542 Santoyo, H., Gonen, T., Ranish, J.A., Asbury, C.L., and Biggins, S. (2010). Tension  
544 directly stabilizes reconstituted kinetochore-microtubule attachments. *Nature* *468*,  
576-579.
- 544 2) Baschong, W., and Aebi, U. (2006). *Glycerol Spraying/Low Angle Rotary Metal  
Shadowing*, Vol 3 (Elsevier Science).
- 546 3) Basilico, F., Maffini, S., Weir, J.R., Prumbaum, D., Rojas, A.M., Zimniak, T., De  
548 Antoni, A., Jeganathan, S., Voss, B., van Gerwen, S., *et al.* (2014). The pseudo  
GTPase CENP-M drives human kinetochore assembly. *Elife* *3*, e02978.
- 548 4) Carroll, C.W., Milks, K.J., and Straight, A.F. (2010). Dual recognition of CENP-A  
nucleosomes is required for centromere assembly. *J Cell Biol* *189*, 1143-1155.
- 550 5) Cheeseman, I.M. (2014). The kinetochore. *Cold Spring Harb Perspect Biol* *6*,  
a015826.
- 552 6) Cheeseman, I.M., Chappie, J.S., Wilson-Kubalek, E.M., and Desai, A. (2006). The  
554 conserved KMN network constitutes the core microtubule-binding site of the  
kinetochore. *Cell* *127*, 983-997.
- 556 7) Ciferri, C., De Luca, J., Monzani, S., Ferrari, K.J., Ristic, D., Wyman, C., Stark, H.,  
558 Kilmartin, J., Salmon, E.D., and Musacchio, A. (2005). Architecture of the human  
NDC80-hec1 complex, a critical constituent of the outer kinetochore. *J Biol Chem*  
*280*, 29088-29095.
- 560 8) Ciferri, C., Pasqualato, S., Screpanti, E., Varetti, G., Santaguida, S., Dos Reis, G.,  
562 Maiolica, A., Polka, J., De Luca, J.G., De Wulf, P., *et al.* (2008). Implications for  
kinetochore-microtubule attachment from the structure of an engineered NDC80  
complex. *Cell* *133*, 427-439.
- 564 9) DeLuca, J.G., Dong, Y., Hergert, P., Strauss, J., Hickey, J.M., Salmon, E.D., and  
McEwen, B.F. (2005). Hec1 and nuf2 are core components of the kinetochore outer  
plate essential for organizing microtubule attachment sites. *Mol Biol Cell* *16*, 519-531.
- 566 10) DeLuca, J.G., Gall, W.E., Ciferri, C., Cimini, D., Musacchio, A., and Salmon, E.D.  
568 (2006). Kinetochore microtubule dynamics and attachment stability are regulated by  
Hec1. *Cell* *127*, 969-982.

- 570 11) Fitzgerald, D.J., Berger, P., Schaffitzel, C., Yamada, K., Richmond, T.J., and Berger, I. (2006). Protein complex expression by using multigene baculoviral vectors. *Nat Methods* *3*, 1021-1032.
- 572 12) Gascoigne, K.E., and Cheeseman, I.M. (2013). CDK-dependent phosphorylation and  
574 nuclear exclusion coordinately control kinetochore assembly state. *J Cell Biol* *201*, 23-32.
- 576 13) Gascoigne, K.E., Takeuchi, K., Suzuki, A., Hori, T., Fukagawa, T., and Cheeseman, I.M. (2011). Induced ectopic kinetochore assembly bypasses the requirement for CENP-A nucleosomes. *Cell* *145*, 410-422.
- 578 14) Guimaraes, C.P., Witte, M.D., Theile, C.S., Bozkurt, G., Kundrat, L., Blom, A.E., and  
580 Ploegh, H.L. (2013). Site-specific C-terminal and internal loop labeling of proteins using sortase-mediated reactions. *Nat Protoc* *8*, 1787-1799.
- 582 15) Guse, A., Carroll, C.W., Moree, B., Fuller, C.J., and Straight, A.F. (2011). In vitro centromere and kinetochore assembly on defined chromatin templates. *Nature* *477*, 354-358.
- 584 16) Hashimoto, Y., Zhang, S., and Blissard, G.W. (2010). Ao38, a new cell line from eggs  
586 of the black witch moth, *Ascalapha odorata* (Lepidoptera: Noctuidae), is permissive for AcMNPV infection and produces high levels of recombinant proteins. *BMC Biotechnol* *10*, 50.
- 588 17) Hill, T.L. (1985). Theoretical problems related to the attachment of microtubules to kinetochores. *Proc Natl Acad Sci U S A* *82*, 4404-4408.
- 590 18) Hirakawa, H., Ishikawa, S., and Nagamune, T. (2015). Ca<sup>2+</sup> -independent sortase-A  
592 exhibits high selective protein ligation activity in the cytoplasm of *Escherichia coli*. *Biotechnology journal* *10*, 1487-1492.
- 594 19) Hori, T., Amano, M., Suzuki, A., Backer, C.B., Welburn, J.P., Dong, Y., McEwen, B.F., Shang, W.H., Suzuki, E., Okawa, K., *et al.* (2008). CCAN makes multiple contacts with centromeric DNA to provide distinct pathways to the outer  
596 kinetochore. *Cell* *135*, 1039-1052.
- 598 20) Hori, T., Shang, W.H., Takeuchi, K., and Fukagawa, T. (2013). The CCAN recruits CENP-A to the centromere and forms the structural core for kinetochore assembly. *J Cell Biol* *200*, 45-60.
- 600 21) Kettenbach, A.N., Schweppe, D.K., Faherty, B.K., Pechenick, D., Pletnev, A.A., and Gerber, S.A. (2011). Quantitative phosphoproteomics identifies substrates and

- 602 functional modules of Aurora and Polo-like kinase activities in mitotic cells. *Sci*  
Signal 4, rs5.
- 604 22) Kim, S., and Yu, H. (2015). Multiple assembly mechanisms anchor the KMN spindle  
checkpoint platform at human mitotic kinetochores. *J Cell Biol* 208, 181-196.
- 606 23) Klare, K., Weir, J.R., Basilico, F., Zimniak, T., Massimiliano, L., Ludwigs, N., Herzog,  
F., and Musacchio, A. (2015). CENP-C is a blueprint for constitutive centromere-  
608 associated network assembly within human kinetochores. *J Cell Biol* 210, 11-22.
- 610 24) Koivomagi, M., Valk, E., Venta, R., Iofik, A., Lepiku, M., Balog, E.R., Rubin, S.M.,  
Morgan, D.O., and Loog, M. (2011). Cascades of multisite phosphorylation control  
Sic1 destruction at the onset of S phase. *Nature* 480, 128-131.
- 612 25) Kwon, M.S., Hori, T., Okada, M., and Fukagawa, T. (2007). CENP-C is involved in  
chromosome segregation, mitotic checkpoint function, and kinetochore assembly.  
614 *Mol Biol Cell* 18, 2155-2168.
- 616 26) Liu, S.T., Rattner, J.B., Jablonski, S.A., and Yen, T.J. (2006). Mapping the assembly  
pathways that specify formation of the trilaminar kinetochore plates in human cells. *J*  
*Cell Biol* 175, 41-53.
- 618 27) Logsdon, G.A., Barrey, E.J., Bassett, E.A., DeNizio, J.E., Guo, L.Y., Panchenko, T.,  
Dawicki-McKenna, J.M., Heun, P., and Black, B.E. (2015). Both tails and the  
620 centromere targeting domain of CENP-A are required for centromere establishment.  
*J Cell Biol* 208, 521-531.
- 622 28) Malvezzi, F., Litos, G., Schleiffer, A., Heuck, A., Mechtler, K., Clausen, T., and  
Westermann, S. (2013). A structural basis for kinetochore recruitment of the NDC80  
624 complex via two distinct centromere receptors. *EMBO J* 32, 409-423.
- 626 29) Michalski, A., Damoc, E., Hauschild, J.P., Lange, O., Wieghaus, A., Makarov, A.,  
Nagaraj, N., Cox, J., Mann, M., and Horning, S. (2011). Mass spectrometry-based  
proteomics using Q Exactive, a high-performance benchtop quadrupole Orbitrap  
628 mass spectrometer. *Mol Cell Proteomics* 10, M111 011015.
- 630 30) Musacchio, A. (2015). The Molecular Biology of Spindle Assembly Checkpoint  
Signaling Dynamics. *Curr Biol* 25, R1002-1018.
- 632 31) Nicklas, R.B., and Koch, C.A. (1969). Chromosome micromanipulation. 3. Spindle  
fiber tension and the reorientation of mal-oriented chromosomes. *J Cell Biol* 43, 40-  
50.

- 634 32) Nishino, T., Rago, F., Hori, T., Tomii, K., Cheeseman, I.M., and Fukagawa, T.  
636 (2013). CENP-T provides a structural platform for outer kinetochore assembly.  
EMBO J 32, 424-436.
- 638 33) Nishino, T., Takeuchi, K., Gascoigne, K.E., Suzuki, A., Hori, T., Oyama, T.,  
Morikawa, K., Cheeseman, I.M., and Fukagawa, T. (2012). CENP-T-W-S-X forms a  
unique centromeric chromatin structure with a histone-like fold. Cell 148, 487-501.
- 640 34) Okada, M., Hori, T., and Fukagawa, T. (2006). The DT40 system as a tool for  
analyzing kinetochore assembly. Sub-cellular biochemistry 40, 91-106.
- 642 35) Pekgoz Altunkaya, G., Malvezzi, F., Demianova, Z., Zimniak, T., Litos, G.,  
644 Weissmann, F., Mechtler, K., Herzog, F., and Westermann, S. (2016). CCAN  
Assembly Configures Composite Binding Interfaces to Promote Cross-Linking of  
NDC80 Complexes at the Kinetochore. Curr Biol.
- 646 36) Petrovic, A., Mosalaganti, S., Keller, J., Mattiuzzo, M., Overlack, K., Krenn, V., De  
648 Antoni, A., Wohlgemuth, S., Cecatiello, V., Pasqualato, S., *et al.* (2014). Modular  
assembly of RWD domains on the MIS12 complex underlies outer kinetochore  
organization. Mol Cell 53, 591-605.
- 650 37) Petrovic, A., Pasqualato, S., Dube, P., Krenn, V., Santaguida, S., Cittaro, D.,  
652 Monzani, S., Massimiliano, L., Keller, J., Tarricone, A., *et al.* (2010). The MIS12  
complex is a protein interaction hub for outer kinetochore assembly. J Cell Biol 190,  
835-852.
- 654 38) Przewlaka, M.R., Venkei, Z., Bolanos-Garcia, V.M., Debski, J., Dadlez, M., and  
656 Glover, D.M. (2011). CENP-C is a structural platform for kinetochore assembly.  
Curr Biol 21, 399-405.
- 658 39) Rago, F., Gascoigne, K.E., and Cheeseman, I.M. (2015). Distinct Organization and  
Regulation of the Outer Kinetochore KMN Network Downstream of CENP-C and  
CENP-T. Curr Biol.
- 660 40) Rappsilber, J., Mann, M., and Ishihama, Y. (2007). Protocol for micro-purification,  
662 enrichment, pre-fractionation and storage of peptides for proteomics using  
StageTips. Nat Protoc 2, 1896-1906.
- 664 41) Samejima, I., Spanos, C., Alves Fde, L., Hori, T., Perpelescu, M., Zou, J., Rappsilber,  
J., Fukagawa, T., and Earnshaw, W.C. (2015). Whole-proteome genetic analysis of  
dependencies in assembly of a vertebrate kinetochore. J Cell Biol 211, 1141-1156.

- 666 42) Schindelin, J., Arganda-Carreras, I., Frise, E., Kaynig, V., Longair, M., Pietzsch, T.,  
668 Preibisch, S., Rueden, C., Saalfeld, S., Schmid, B., *et al.* (2012). Fiji: an open-source  
platform for biological-image analysis. *Nat Methods* *9*, 676-682.
- 670 43) Schleiffer, A., Maier, M., Litos, G., Lampert, F., Hornung, P., Mechtler, K., and  
Westermann, S. (2012). CENP-T proteins are conserved centromere receptors of the  
NDC80 complex. *Nat Cell Biol* *14*, 604-613.
- 672 44) Schuck, P. (2000). Size-distribution analysis of macromolecules by sedimentation  
velocity ultracentrifugation and lamm equation modeling. *Biophys J* *78*, 1606-1619.
- 674 45) Screpanti, E., De Antoni, A., Alushin, G.M., Petrovic, A., Melis, T., Nogales, E., and  
676 Musacchio, A. (2011). Direct binding of Cenp-C to the MIS12 complex joins the  
inner and outer kinetochore. *Curr Biol* *21*, 391-398.
- 678 46) Suzuki, A., Badger, B.L., and Salmon, E.D. (2015). A quantitative description of  
NDC80 complex linkage to human kinetochores. *Nature communications* *6*, 8161.
- 680 47) Suzuki, A., Hori, T., Nishino, T., Usukura, J., Miyagi, A., Morikawa, K., and  
Fukagawa, T. (2011). Spindle microtubules generate tension-dependent changes in  
the distribution of inner kinetochore proteins. *J Cell Biol* *193*, 125-140.
- 682 48) Tang, G., Peng, L., Baldwin, P.R., Mann, D.S., Jiang, W., Rees, I., and Ludtke, S.J.  
684 (2007). EMAN2: an extensible image processing suite for electron microscopy. *J  
Struct Biol* *157*, 38-46.
- 686 49) Wei, R.R., Al-Bassam, J., and Harrison, S.C. (2007). The NDC80/HEC1 complex is a  
contact point for kinetochore-microtubule attachment. *Nat Struct Mol Biol* *14*, 54-  
59.
- 688 50) Wei, R.R., Sorger, P.K., and Harrison, S.C. (2005). Molecular organization of the  
690 NDC80 complex, an essential kinetochore component. *Proc Natl Acad Sci U S A*  
*102*, 5363-5367.
- 692 51) Weir, J.R., Faesen, A.C., Klare, K., Petrovic, A., Basilico, F., Fischbock, J., Pentakota,  
S., Keller, J., Pesenti, M.E., Pan, D., *et al.* (2016). Insights from biochemical  
reconstitution into the architecture of human kinetochores. *10.1038/nature19333*.
- 694 52) Weissmann, F., Petzold, G., VanderLinden, R., Huis In 't Veld, P.J., Brown, N.G.,  
696 Lampert, F., Westermann, S., Stark, H., Schulman, B.A., and Peters, J.M. (2016).  
biGBac enables rapid gene assembly for the expression of large multisubunit protein  
complexes. *Proc Natl Acad Sci U S A* *113*, E2564-2569.



- 698 53) Xue, Y., Liu, Z., Cao, J., Ma, Q., Gao, X., Wang, Q., Jin, C., Zhou, Y., Wen, L., and  
700 Ren, J. (2011). GPS 2.1: enhanced prediction of kinase-specific phosphorylation sites  
with an algorithm of motif length selection. *Protein Eng Des Sel* 24, 255-260.
- 702 54) Zaytsev, A.V., Sundin, L.J., DeLuca, K.F., Grishchuk, E.L., and DeLuca, J.G. (2014).  
Accurate phosphoregulation of kinetochore-microtubule affinity requires  
704 unconstrained molecular interactions. *J Cell Biol* 206, 45-59.

## Figure Legends

706

**Figure 1. Phosphorylation of CENP-T<sup>2-101</sup> at T11 or T85 is sufficient for the**  
708 **binding of SPC24:SPC25. (A)** Schematic representation of CENP-C and CENP-T  
recruiting MIS12C:NDC80C and NDC80C. **(B)** Besides the histone-fold domain (HFD)  
710 at the carboxy terminus, CENP-T mainly consists of regions of compositional bias, rich  
in polar residues, and likely to be intrinsically disordered. Boundaries of CENP-T  
712 constructs used in this study and domains involved in the binding of NDC80C and  
DNA/CCAN are indicated. *In vitro* phosphorylated residues in CENP-T<sup>1-101</sup> are marked  
714 by a P (see also Table 1). **(C)** The binding between SPC24:SPC25 and four CENP-T  
phosphopeptides was determined by isothermal titration calorimetry. The y-axis indicates  
716 kcal/mole of injectant. Dissociation constants between SPC24:SPC25 and  
phosphopeptides containing T11 and T85 were determined to be 45  $\mu$ M and 4  $\mu$ M  
718 respectively. **(D)** SDS-PAGE analysis of various CENP-T<sup>2-101</sup> mutants that were  
incubated with SPC24:SPC25 and separated by analytical size-exclusion chromatography  
720 showing that phosphorylation of CENP-T at T11 or T85 is sufficient for the binding of  
SPC24:SPC25. Phosphorylation of T27 and S47 is dispensable. Red asterisks indicate  
722 mutated phosphorylation sites. See also figure 1 - figure supplement 1 for the entire  
dataset.

724

**Figure 1 - figure supplement 1. Phosphorylation of CENP-T<sup>2-101</sup> at T11 or T85 is**  
726 **sufficient for the binding of SPC24:SPC25.** SDS-PAGE analysis of various CENP-T<sup>2-</sup>  
<sup>101</sup> mutants that were incubated with SPC24:SPC25 and separated by analytical size-  
728 exclusion chromatography (Superdex 200 5/150). The six gels boxed in orange are  
displayed in Figure 1D.

730 **Figure 2. CENP-T phosphorylated at T11 and T85 binds two copies of**  
**SPC24:SPC25.** Analytical size-exclusion chromatography (Superdex 200 5/150 increase)  
732 and SDS-PAGE show that CENP-T<sup>2-373</sup> phosphorylated by CDK1:Cyclin B at positions  
T11 and T85 can bind two copies of SPC24:SPC25. CENP-T was fluorescently labeled  
734 with FAM (wt) or TMR (mutants) and monitored specifically during chromatography  
and after SDS-PAGE. Red asterisks indicate mutated phosphorylation sites.

736 **Figure 3. Phosphorylated CENP-T recruits two full-length NDC80 complexes.**  
738 (A). Analytical size-exclusion chromatography (Superose 6 5/150) and SDS-PAGE show  
740 that CENP-T<sup>2-373</sup> phosphorylated by CDK1:Cyclin B at positions T11 and T85 can bind  
742 two full-length NDC80 complexes. The mixture of CENP-T (2 μM) and NDC80C (5  
744 μM) contained NDC80C, CENP-T:NDC80C, as well as CENP-T:NDC80C<sub>2</sub> species  
(green trace). The specific monitoring of fluorescently labeled CENP-T was used to  
746 distinguish these species. Red asterisks indicate mutated phosphorylation sites. Analysis  
748 of the single T11A and T85A CENP-T mutants and additional controls are included in  
750 **Figure 3 - figure supplement 1. (B)** NDC80C (top row) and CENP-T:NDC80C<sub>2</sub>,  
(middle and bottom rows) were visualized by electron microscopy after glycerol spraying  
and low-angle platinum shadowing. Asterisks mark the kink in the NDC80:NUF2 coiled  
coil region. The first micrographs show a representative field of view at a lower  
magnification. All scale bars represent 50 nm. More micrographs of NDC80C and  
CENP-T:NDC80C<sub>2</sub> as well as sample preparation information are included in **Figure 3 -  
figure supplements 2-4.**

752

**Figure 3 - figure supplement 1. Phosphorylated CENP-T recruits two full-length  
754 NDC80 complexes.** (A) A fraction of the samples was analyzed by SDS-PAGE prior to  
size exclusion chromatography. The phosphorylation-induced shift of CENP-T is clearly  
756 visible. (B,C) Analytical size-exclusion chromatography (Superose 6 5/150) and SDS-  
PAGE showing that CENP-T phosphorylated by CDK1 at positions T11 and T85 can  
758 bind two full-length NDC80 complexes. Data for NDC80C alone (grey), NDC80C  
mixed with phosphorylated wild-type (green) or T11A-T85A (red) CENP-T are displayed  
760 in **Figure 3.**

762

**Figure 3 - figure supplement 2. Gallery and measurements of NDC80C.** (A)  
764 Purified NDC80 complexes were separated by size exclusion chromatography and  
visualized after glycerol spraying followed by low-angle metal shadowing. The three  
766 micrographs in the top row are shown in **Figure 3. (B)** Gallery showing 64 selected areas  
with one or more NDC80Cs. Scale bars represent 50 nm. (C) End-end and coiled coil

768 distances were measured for the indicated number of shadowed NDC80Cs. The  
displayed values are not corrected for an estimated low-angle shadowing contribution of  
770 3 nm at either end of NDC80C.

772

**Figure 3 - figure supplement 3. Sample preparation for shadowing EM.** NDC80C  
774 was mixed with phosphorylated CENP-T or with an isolated CENP-T:MIS12C complex  
and analyzed by analytical size-exclusion chromatography (Superose 6 5/150) and SDS-  
776 PAGE. Different gels from the same material were used for Coomassie staining and the  
stain-free identification of fluorescent CENP-T. Samples that were used for low-angle  
778 metal shadowing are indicated by the black arrow. Results are shown in **Figure 3B** and  
**Figure 5B** as well as in **Figure 3 - figure supplement 4** and **Figure 5 - figure**  
780 **supplements 2-3.**

782

**Figure 3 - figure supplement 4. Gallery and measurements of CENP-T:NDC80C<sub>2</sub>.**  
784 **(A)** CENP-T:NDC80C<sub>2</sub> complexes were visualized after glycerol spraying followed by  
low-angle metal shadowing. The orange-boxed micrographs are shown in **Figure 3B**.  
786 Scale bar 50 nm. **(B)** The apparent relative orientation of the two NDC80Cs in CENP-  
T:NDC80C<sub>2</sub> complexes was measured.

788 **Figure 4. CENP-T phosphorylated by CDK1 at position S201 binds the MIS12**  
790 **complex (A)** Analytical size-exclusion chromatography (Superdex 200 5/150 increase)  
792 and SDS-PAGE show that CENP-T<sup>2-373</sup> phosphorylated by CDK1:Cyclin B at S201  
794 binds to MIS12C. Red asterisks indicate mutated phosphorylation sites. Fluorescently  
796 labeled CENP-T was monitored specifically during chromatography and after SDS-  
798 PAGE. Additional controls are included in **Figure 4 - figure supplement 1. (B)**  
Sedimentation velocity analytical ultracentrifugation of MIS12C, CENP-T, and  
MIS12C:CENP-T show that MIS12C and CENP-T bind in a 1:1 complex. MIS12C was  
monitored by its absorbance at 280 nm whereas CENP-T and the CENP-T:MIS12C  
mixture were followed using the absorbance of the fluorescently labeled CENP-T<sup>TMR</sup> at  
555 nm.

800

**Figure 4 - figure supplement 1. CENP-T phosphorylated by CDK1:Cyclin B at**  
802 **position S201 binds the MIS12 complex. (A)** A fraction of the mixed samples was  
analyzed by SDS-PAGE prior to size exclusion chromatography. The phosphorylation-  
804 induced shift of CENP-T is clearly visible. **(B,C)** Analytical size-exclusion  
chromatography (Superdex 200 5/150 increase) and SDS-PAGE show that CENP-T  
806 phosphorylated by CDK1 at position S201 binds MIS12C. Data for MIS12C alone  
(grey), MIS12C mixed with unphosphorylated CENP-T (black), and MIS12C mixed with  
808 phosphorylated wild type (green), T11A-T85A (red), or S201A (blue) CENP-T are  
displayed in **Figure 4.**

810

812 **Figure 4 - figure supplement 2. CENP-T mutated at position T195 binds MIS12C.**  
The phosphorylation of CENP-T at position T195 has previously been shown to  
814 contribute to the recruitment of MIS12C to CENP-T *in vivo* (Rago et al., 2015). Here we  
use size-exclusion chromatography (Superdex 200 5/150) and SDS-PAGE to show that  
816 phosphorylated CENP-T<sup>T195A</sup> binds MIS12C *in vitro* whereas CENP-T<sup>S201A</sup> does not.

**Figure 5. Reconstitution and visualization of CENP-T:MIS12C bound to three**  
818 **full-length NDC80 complexes.** (A). Analytical size-exclusion chromatography  
(Superose 6 5/150 increase) and SDS-PAGE show that CENP-T<sup>2-373</sup> phosphorylated by  
820 CDK1:Cyclin B can bind MIS12C and three full-length NDC80 complexes. The triple  
mutation of phospho-sites T11, T85, and S201 is sufficient to prevent CENP-T from  
822 interacting with NDC80C and MIS12C:NDC80C (purple). Red asterisks indicate  
mutated phosphorylation sites. Fluorescently labeled CENP-T was monitored specifically  
824 during chromatography and after SDS-PAGE. The analysis of the complete set of  
CENP-T mutants is included as **Figure 5 - figure supplement 1.** (B) MIS12C:NDC80C  
826 (top row) and CENP-T:MIS12C:NDC80C<sub>3</sub> (middle and bottom rows) were visualized by  
electron microscopy after glycerol spraying and low-angle platinum shadowing. MIS12C  
828 forms a rod-like extension in the MIS12C:NDC80C complexes and can in some cases  
also be distinguished as a module in CENP-T:MIS12C:NDC80C<sub>3</sub> assemblies. In those  
830 cases, CENP-T T11 and T85 are positioned at the base of the other two NDC80Cs (as  
annotated in the bottom right micrograph). The first micrographs show a representative  
832 field of view at a lower magnification. Scale bars represent 50 nm. Sample preparation is  
described in **Figure 3 - figure supplement 3.** More micrographs of MIS12C:NDC80C  
834 and CENP-T:MIS12C:NDC80C<sub>3</sub> are included in **Figure 5 - figure supplements 2-3.**

836

**Figure 5 - figure supplement 1. Supercomplex formation depends on the**  
838 **phosphorylation of CENP-T T11, T85, and S201.** (A) A fraction of the mixed samples  
was analyzed by SDS-PAGE prior to size exclusion chromatography. The  
840 phosphorylation-induced shift of CENP-T is clearly visible, also for the triple CENP-T  
mutant. (B,C) Analytical size-exclusion chromatography (Superose 6 5/150 increase) and  
842 SDS-PAGE show that phosphorylation by CDK1:Cyclin B of CENP-T at positions T11,  
T85, and S201 is required for the formation of CENP-T:MIS12C:NDC80C<sub>3</sub> assemblies.  
844 Data for MIS12C:NDC80C alone (grey) and various phosphorylated CENP-T mutants  
(green, red, blue, purple) are part of **Figure 5.**

846

848

**Figure 5 - figure supplement 2. Gallery and measurements of MIS12C:NDC80C.**

850 (A) MIS12C:NDC80C complexes were visualized after glycerol spraying followed by  
low-angle metal shadowing. The three micrographs in the top row are also shown in  
852 **Figure 5B.** (B) Gallery showing 64 MIS12C:NDC80C complexes. Scale bars represent  
50 nm. (C) End-end and coiled coil distances were measured for the indicated number of  
854 shadowed MIS12C:NDC80C complexes. The values shown here are not corrected for an  
estimated low-angle shadowing contribution of 3 nm at either end.

856

**Figure 5 - figure supplement 3. Figure 13 Galleries of CENP-T:MIS12C:NDC80C.**

858 CENP-T:MIS12C:NDC80C complexes were visualized after glycerol spraying followed  
860 by low-angle metal shadowing. The orange-boxed CENP-T:MIS12C:NDC80C<sub>3</sub>  
micrographs are shown in **Figure 5B.** The number of shown CENP-  
862 T:MIS12C:NDC80C<sub>3</sub> (panel A; 64), CENP-T:MIS12C:NDC80C<sub>2</sub> (panel B; 32), and  
CENP-T<sub>x</sub>:MIS12C<sub>x</sub>:NDC80C<sub>>3</sub> (panel C; 16) micrographs is roughly indicative of the  
864 relative abundance of the various assemblies. Scale bars 50 nm.



**Figure 6. CENP-T and CENP-C are competitive binders of the MIS12 complex.**

866 Analytical size-exclusion chromatography (Superdex 200 5/150) and SDS-PAGE show  
that CENP-T phosphorylated by CDK1-cyclinB at position S201 can bind MIS12C but  
868 not MIS12C:CENP-C. Red asterisks indicate mutated phosphorylation sites for CENP-T  
and the K10A and Y13A mutations in CENP-C. Fluorescently labeled CENP-T was  
870 monitored specifically during chromatography.

872

**Figure 6 - figure supplement 1. CENP-T and CENP-C are competitive binders of**

874 **the MIS12 complex.** Analytical size-exclusion chromatography (Superdex 200 5/150)  
and SDS-PAGE show that CENP-C<sup>1-71</sup> as well as CENP-C<sup>2-545</sup> form a complex with  
876 MIS12C that can no longer bind CENP-T. Fluorescently labeled CENP-T was  
monitored specifically during chromatography.

878 **Figure 7. Molecular basis of stoichiometric assembly of microtubule binders in**  
**the outer kinetochore.** Schematic representation of the results presented here and their  
880 implications. CDK activity results in the recruitment of NDC80C and MIS12C:NDC80C  
to CENP-T. The predicted stoichiometry of a single kinetochore unit is indicated. In the  
882 middle panel, we summarize the role of T11, T85, and S201 in recruitment of NDC80C  
and MIS12C, and suggest that T195 may contribute to phosphorylation of S201 *in vivo*.

884 **Table 1. Phospho-sites on CENP-T<sup>2-373</sup> *in vitro* phosphorylated by CDK1:Cyclin B.**

886 Identified phospho-peptides with a localization probability for the phospho-site > 90%  
 888 and an Andromeda search engine score >140 are shown. All peptides have a posterior error probability (PEP) below  $1 \times 10^{-30}$ . Modified sites are highlighted in green. Asterisks indicate CDK consensus sites (Xue et al., 2011).

| Position | Modified peptide                                     | Score | CDK1 |
|----------|------------------------------------------------------|-------|------|
| 10       | GPLGSADHNPDSDS*TPR                                   | 325   |      |
| 11       | GPLGSADHNPDSDS*TPR                                   | 325   | *    |
| 14       | GPLGSADHNPDSDS*TPR*LLR                               | 287   |      |
| 22       | VLD* <b>T</b> ADPRTPR                                | 153   | *    |
| 27       | VLD <b>T</b> ADPRT*PR                                | 240   | *    |
| 45       | RALLE <b>T</b> ASPRK                                 | 145   | *    |
| 47       | RALLE <b>T</b> ASPRK                                 | 205   | *    |
| 78       | SAHIQAS <b>G</b> HLEEQ*TPR                           | 144   |      |
| 85       | SAHIQAS <b>G</b> HLEEQ*TPR                           | 300   | *    |
| 88       | SAHIQAS <b>G</b> HLEEQ*TPR*LLK                       | 252   |      |
| 107      | <b>S</b> VVKPVPAPQAVQPSRQE                           | 161   |      |
| 141      | QESSCGSLELQLPELEPP* <b>T</b> TLAPGLLAPGR             | 236   |      |
| 142      | PVPAPQAVQPSRQESSCGSLELQLPELEPP* <b>T</b> TLAPGLLAPGR | 217   |      |
| 160      | LRL <b>S</b> VFQQGVDQGLSLSQEPQGNADASSLTR             | 351   |      |
| 171      | LSVFQQGVDQGL <b>S</b> LSQEPQGNADASSLTR               | 284   |      |
| 183      | LSVFQQGVDQGLSLSQEPQGNADASSL <b>T</b> R               | 299   |      |
| 184      | LSVFQQGVDQGLSLSQEPQGNADASSL <b>T</b> R               | 403   |      |
| 188      | <b>S</b> LNLT <b>F</b> ATPLQPQSVQRPGLAR              | 162   |      |
| 195      | SLNLT <b>F</b> AT*PLQPQSVQRPGLAR                     | 257   | *    |
| 201      | SLNLT <b>F</b> ATPLQPQ <b>S</b> VQRPGLAR             | 315   |      |
| 251      | DTQPFSQPMV <b>G</b> SPNVYHSLPCTPHTGAE                | 155   |      |

890

Figure 1. Phosphorylation of CENP-T at T11 or T85 is sufficient for the binding of SPC24:SPC25

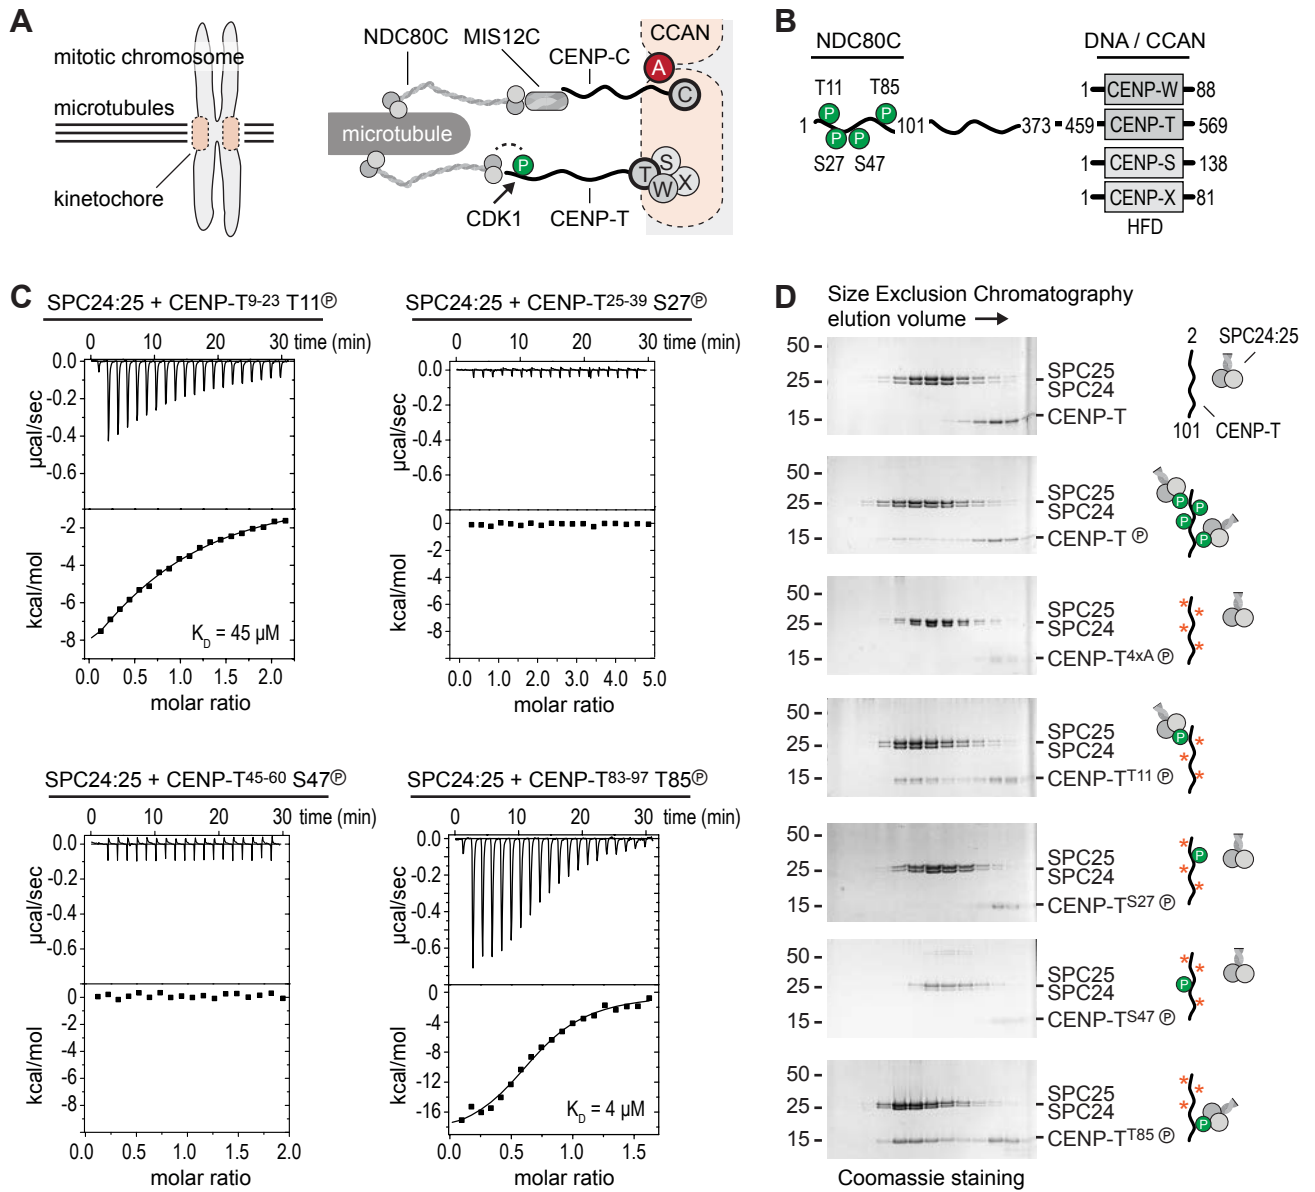

Figure 2. CENP-T phosphorylated at T11 and T85 binds two copies of SPC24:SPC25

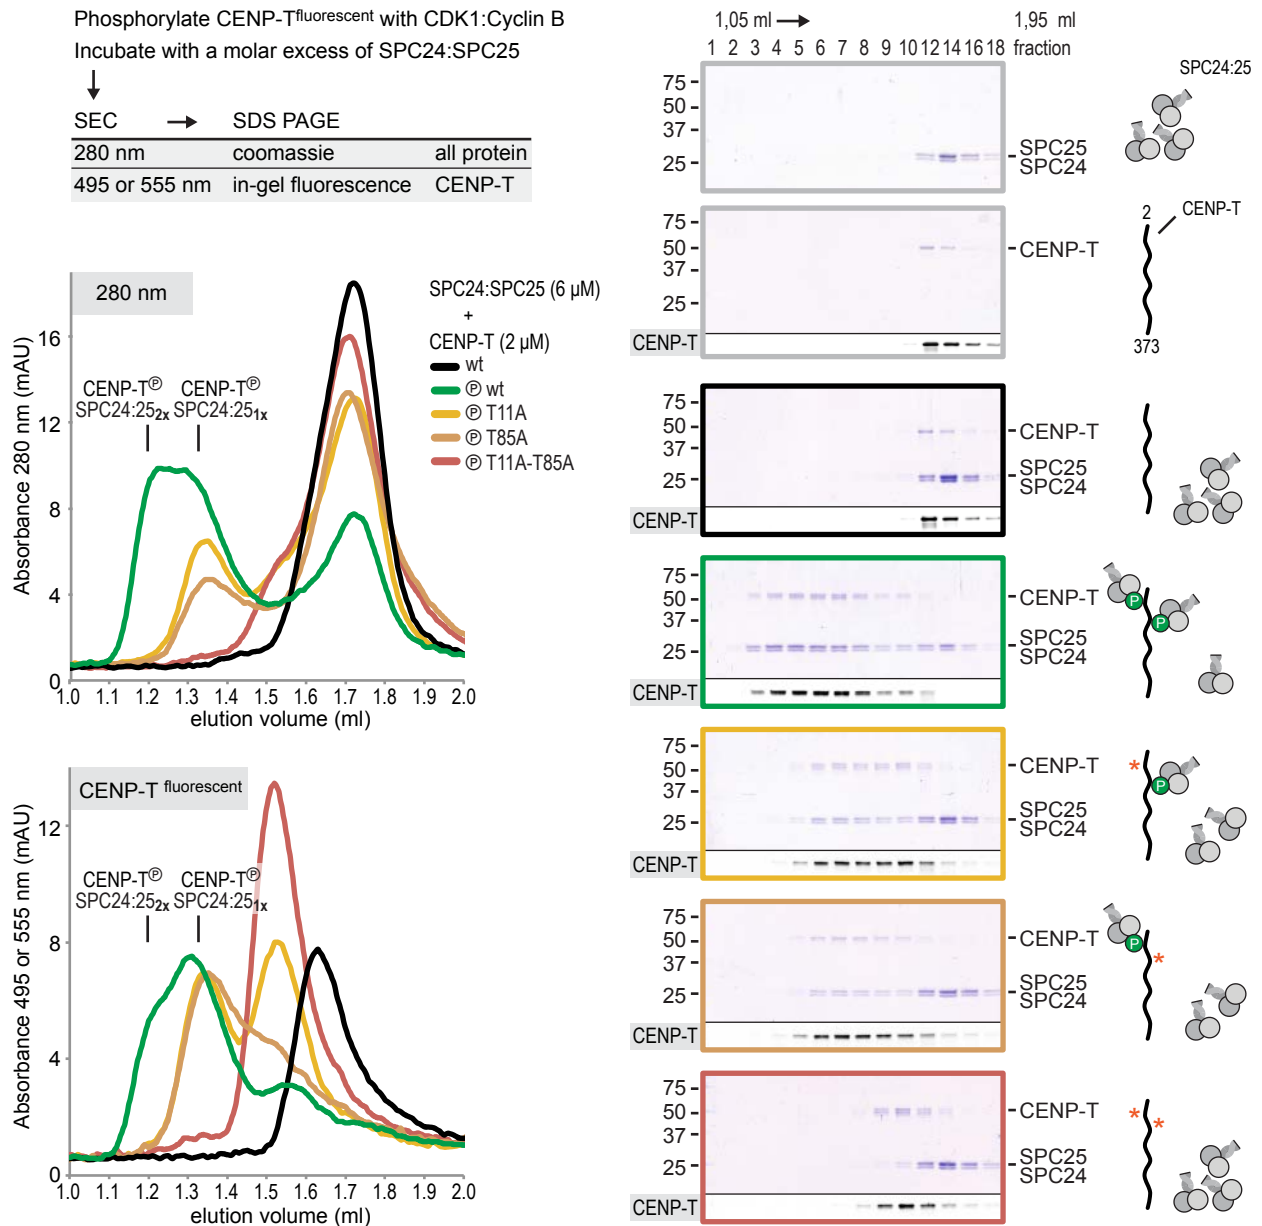

Figure 3. Phosphorylated CENP-T recruits two full-length NDC80 complexes

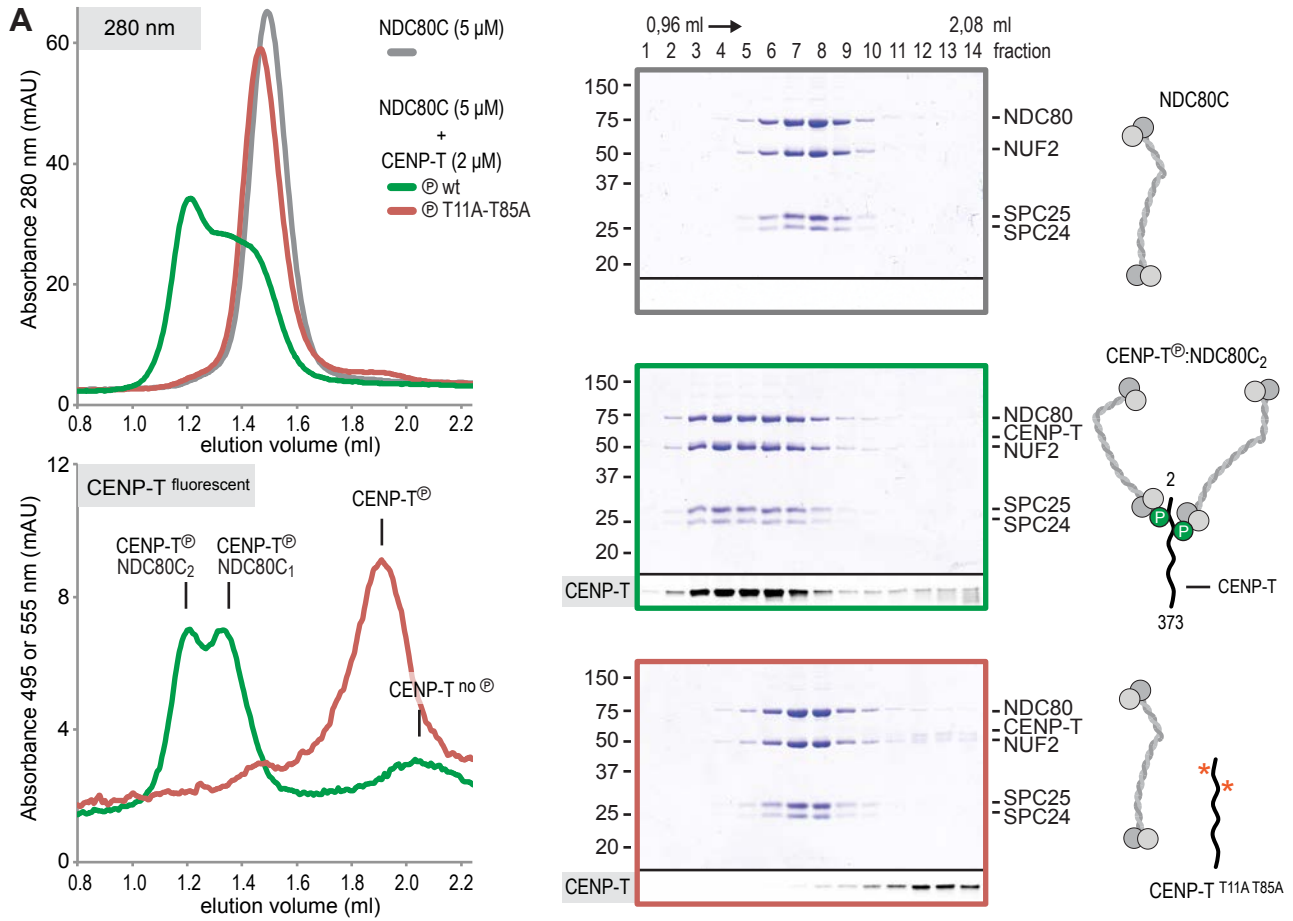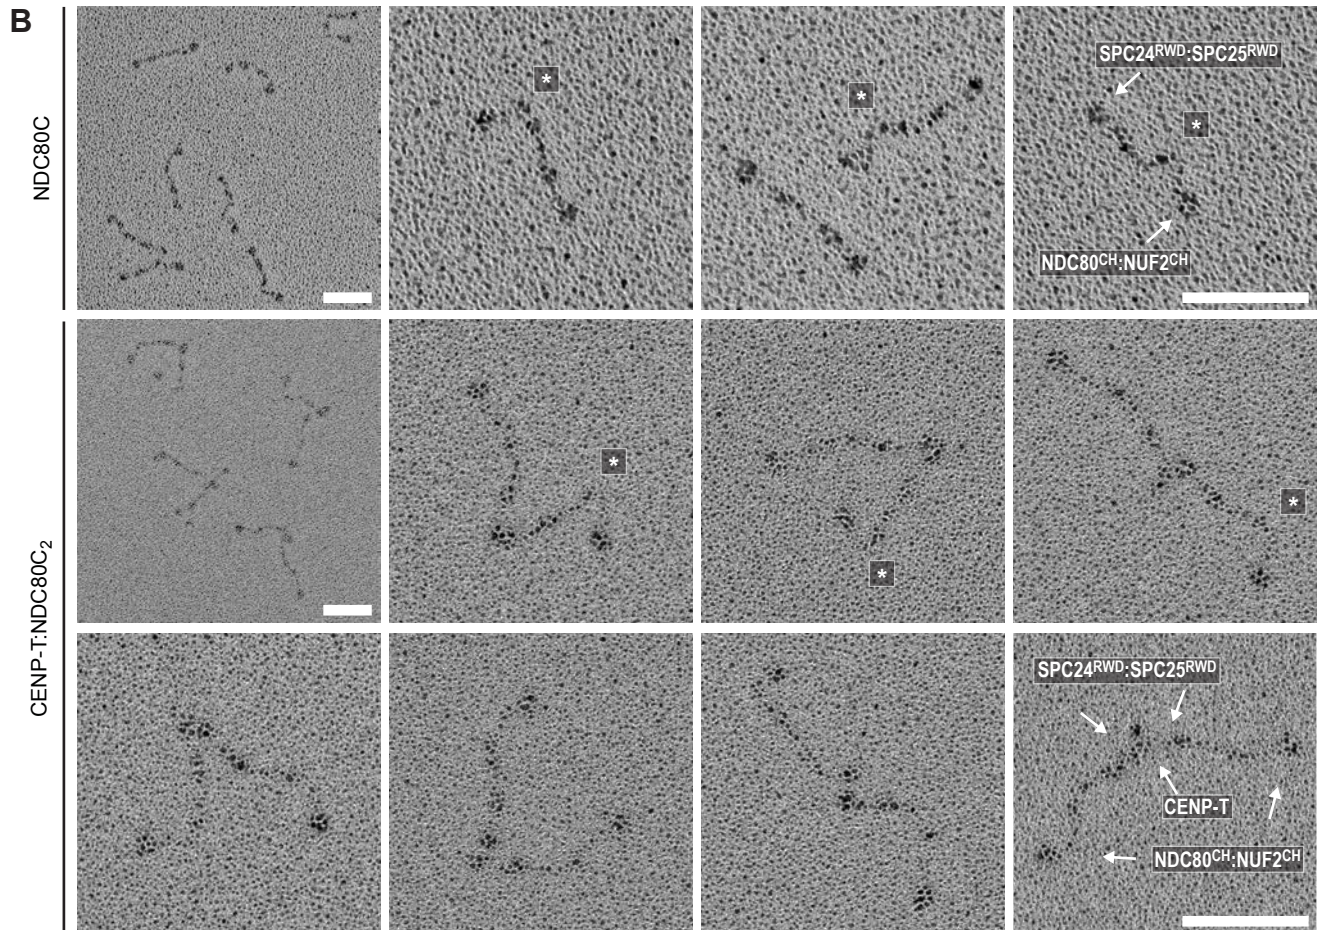

Figure 4. CENP-T phosphorylated by CDK1:Cyclin B at position S201 binds the MIS12 complex

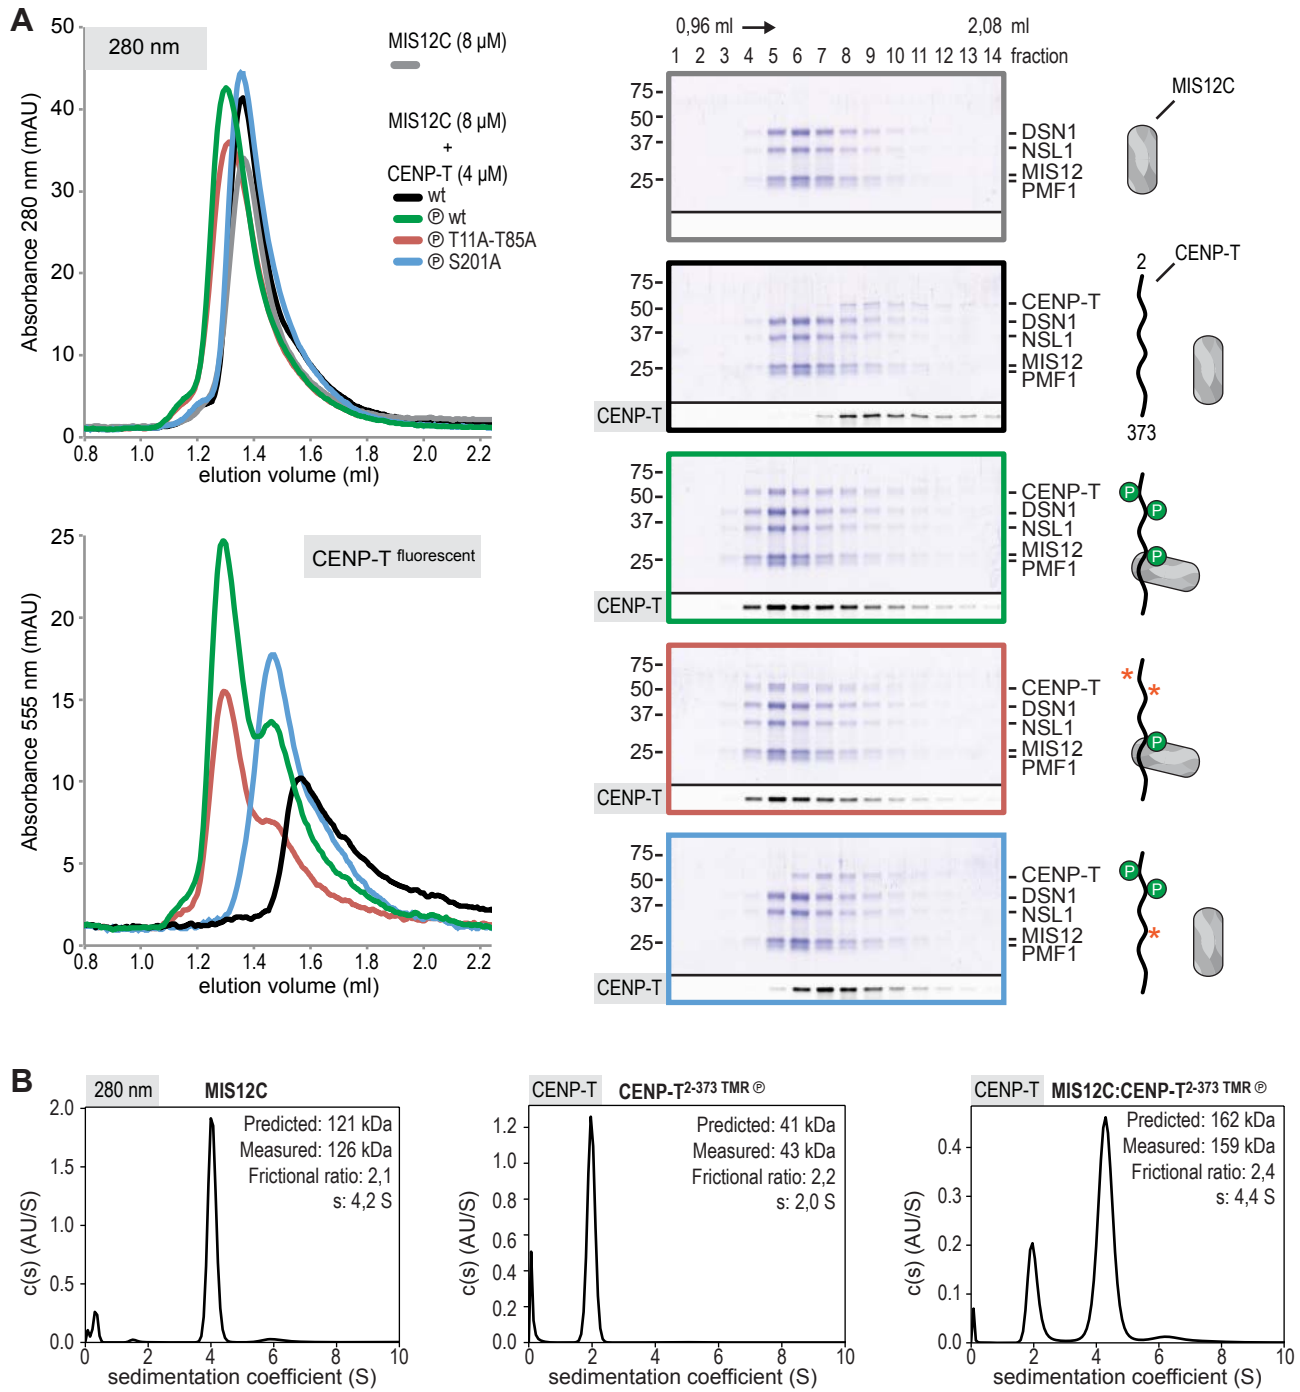

Figure 5. Reconstitution and visualization of CENP-T:MIS12C bound to three NDC80 complexes

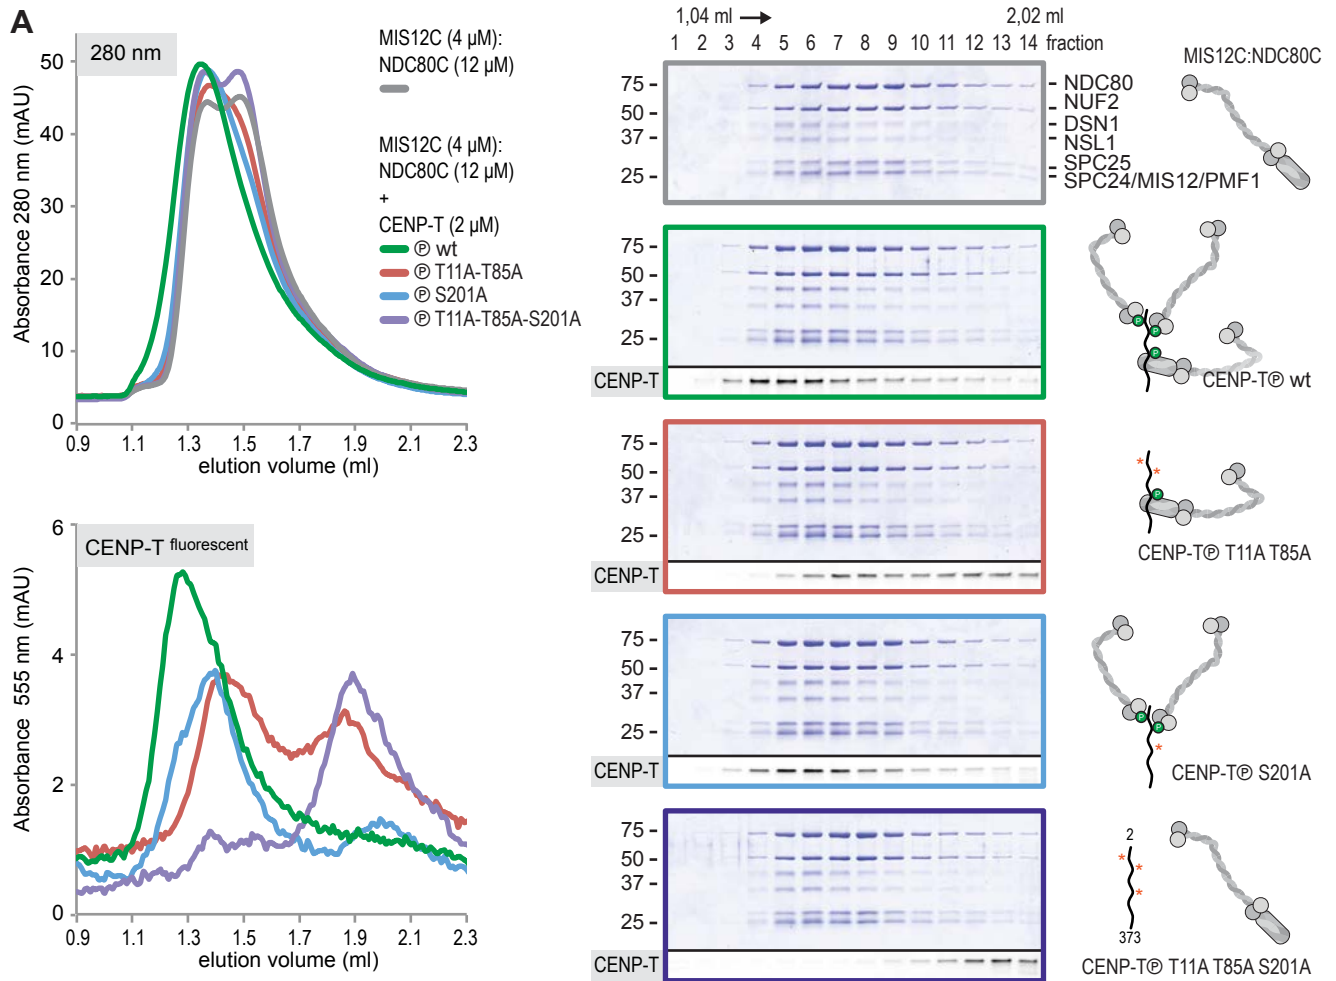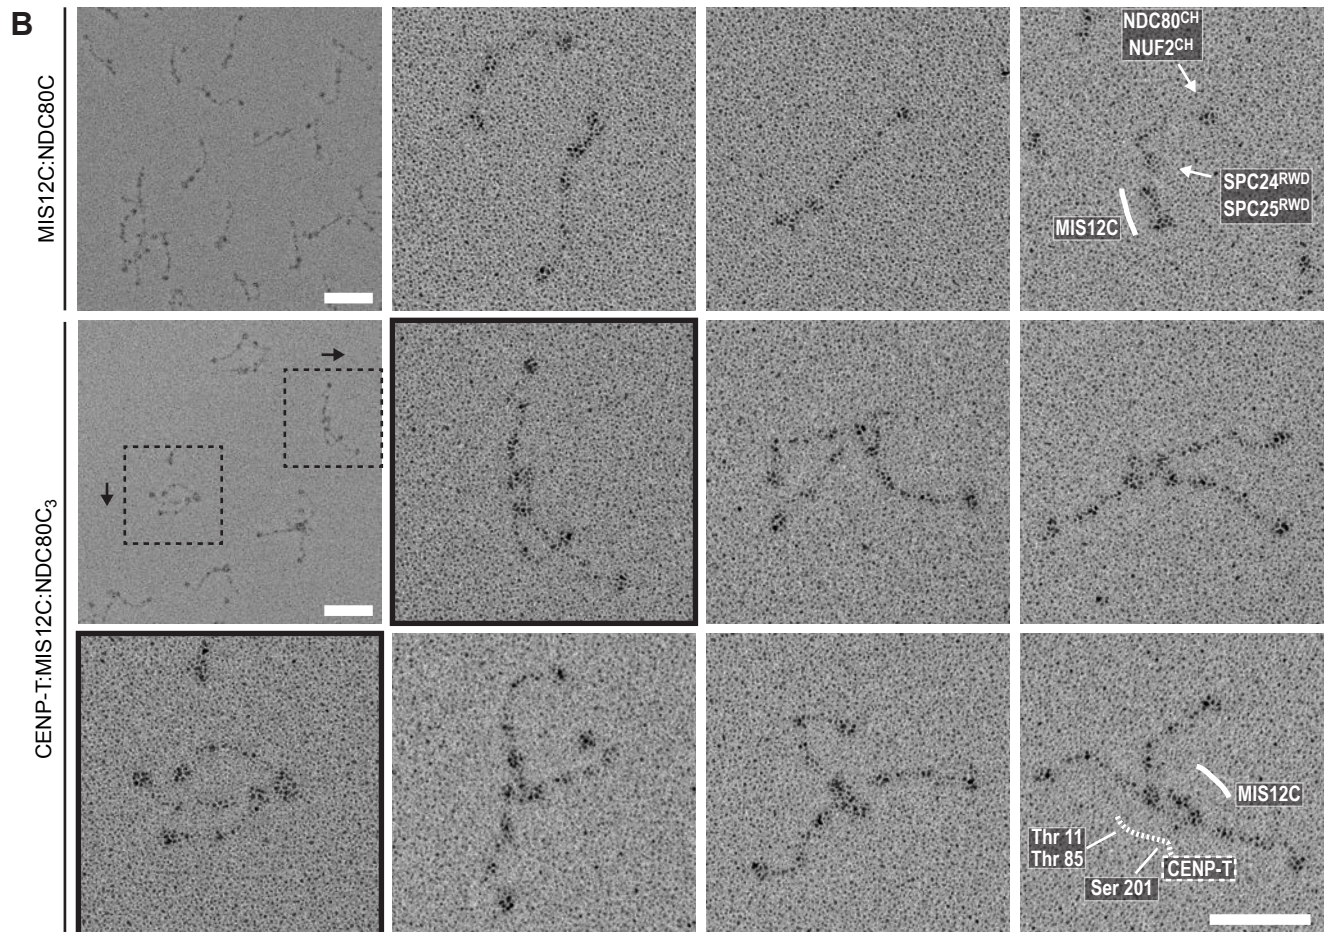



Figure 6. CENP-T and CENP-C are competitive binders of the MIS12 complex

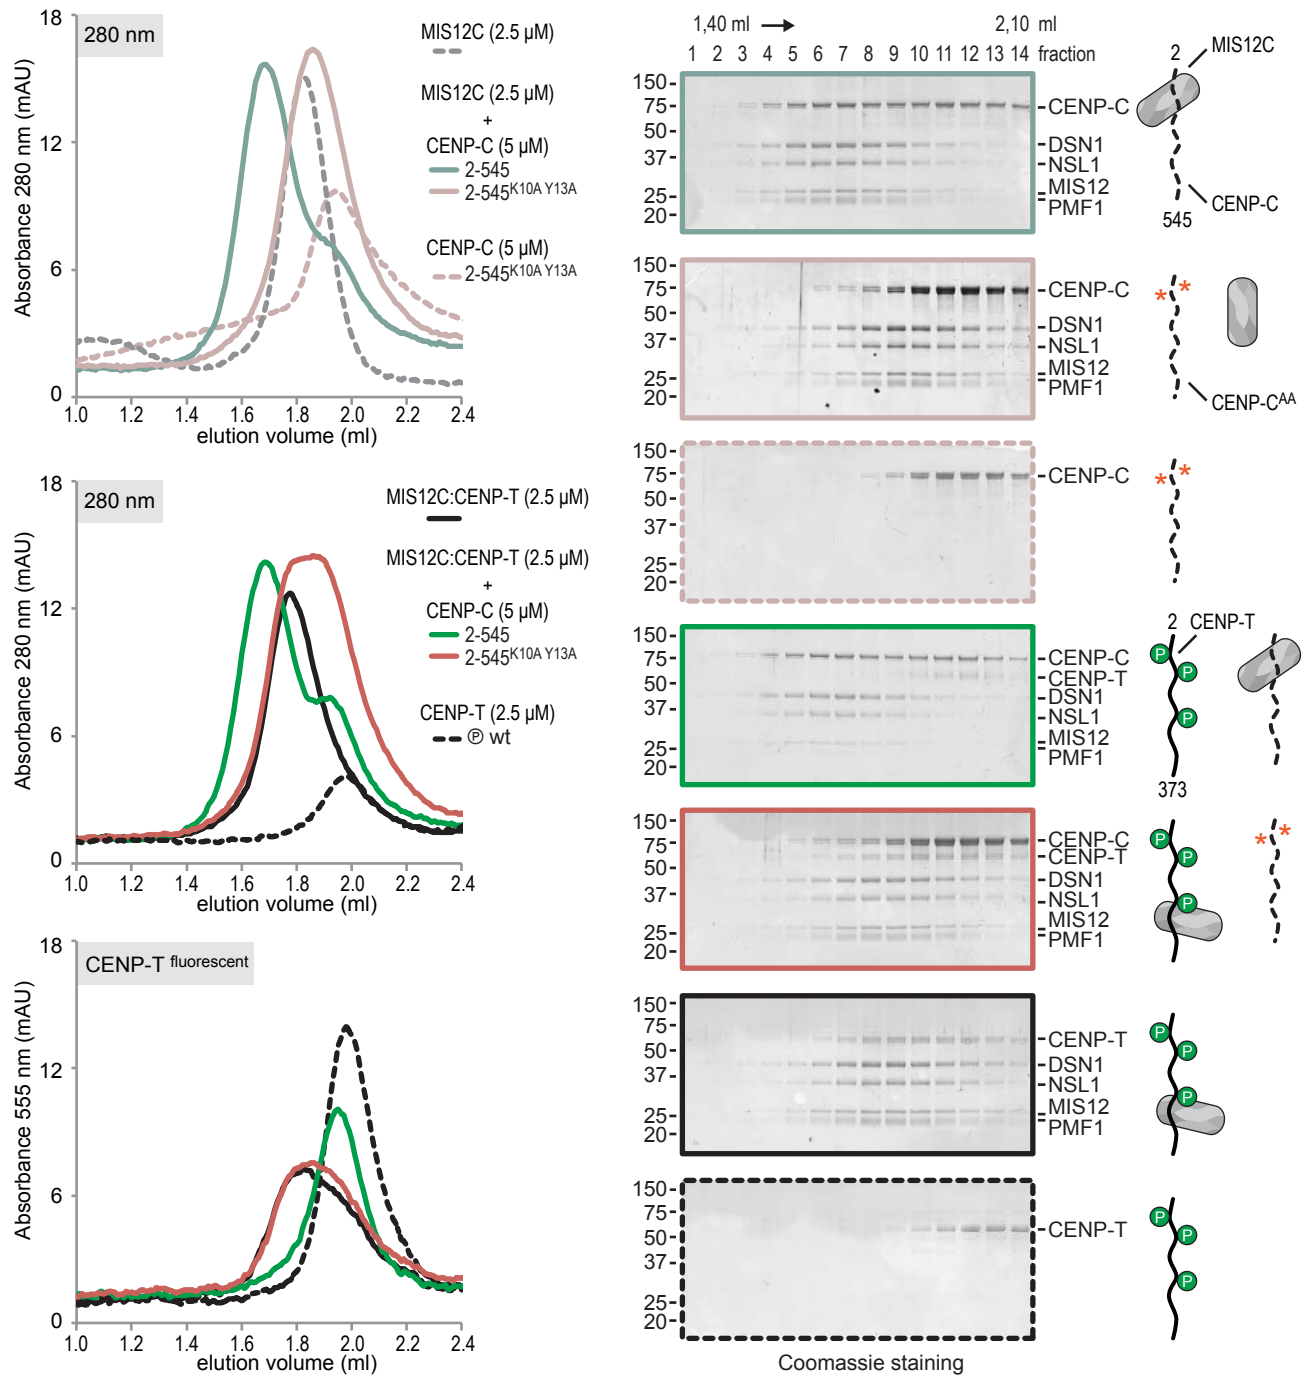

Figure 7. Molecular basis of stoichiometric assembly of microtubule binders in the outer kinetochore

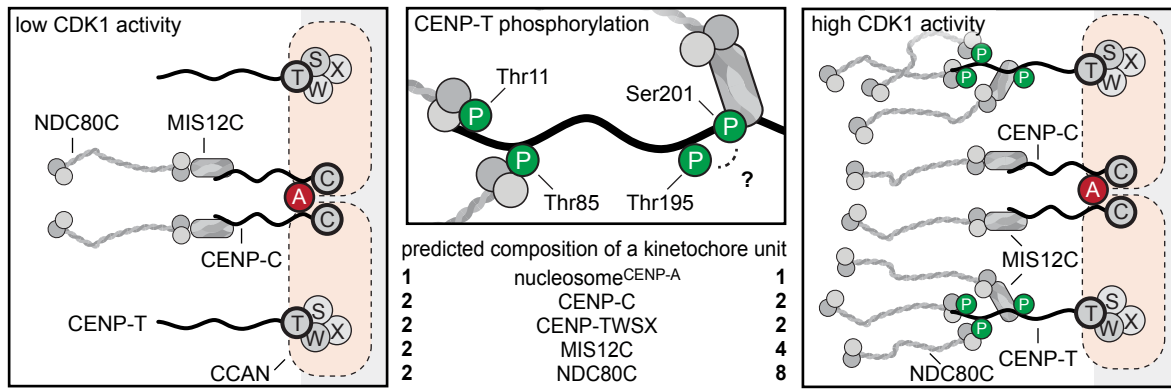

Figure 1 - figure supplement 1. Phosphorylation of CENP-T at T11 or T85 is sufficient for the binding of SPC24:SPC25

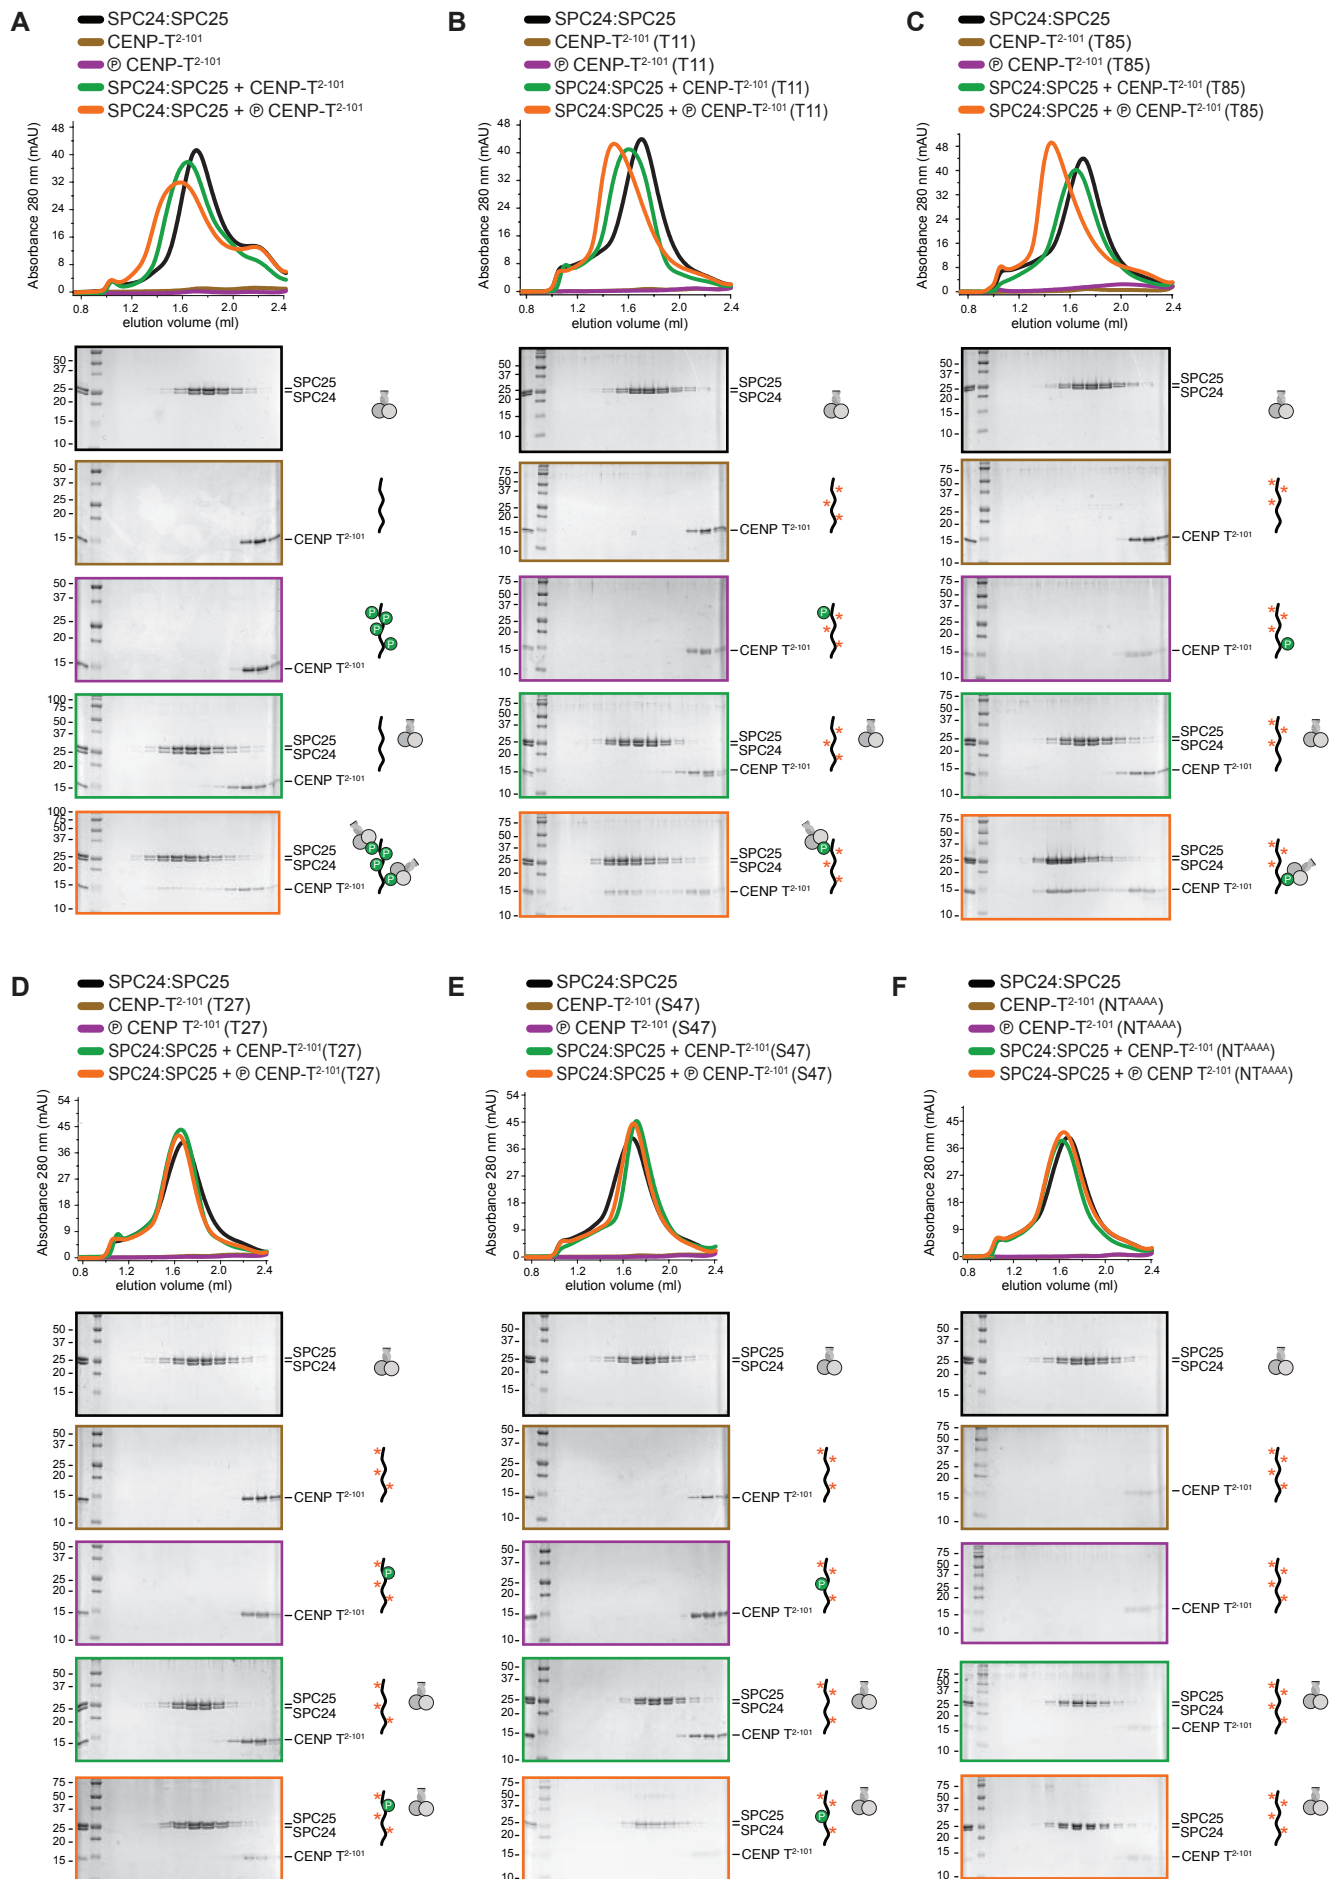

Figure 3 - figure supplement 1. CENP-T phosphorylated at position T11 and T85 can bind two NDC80 complexes

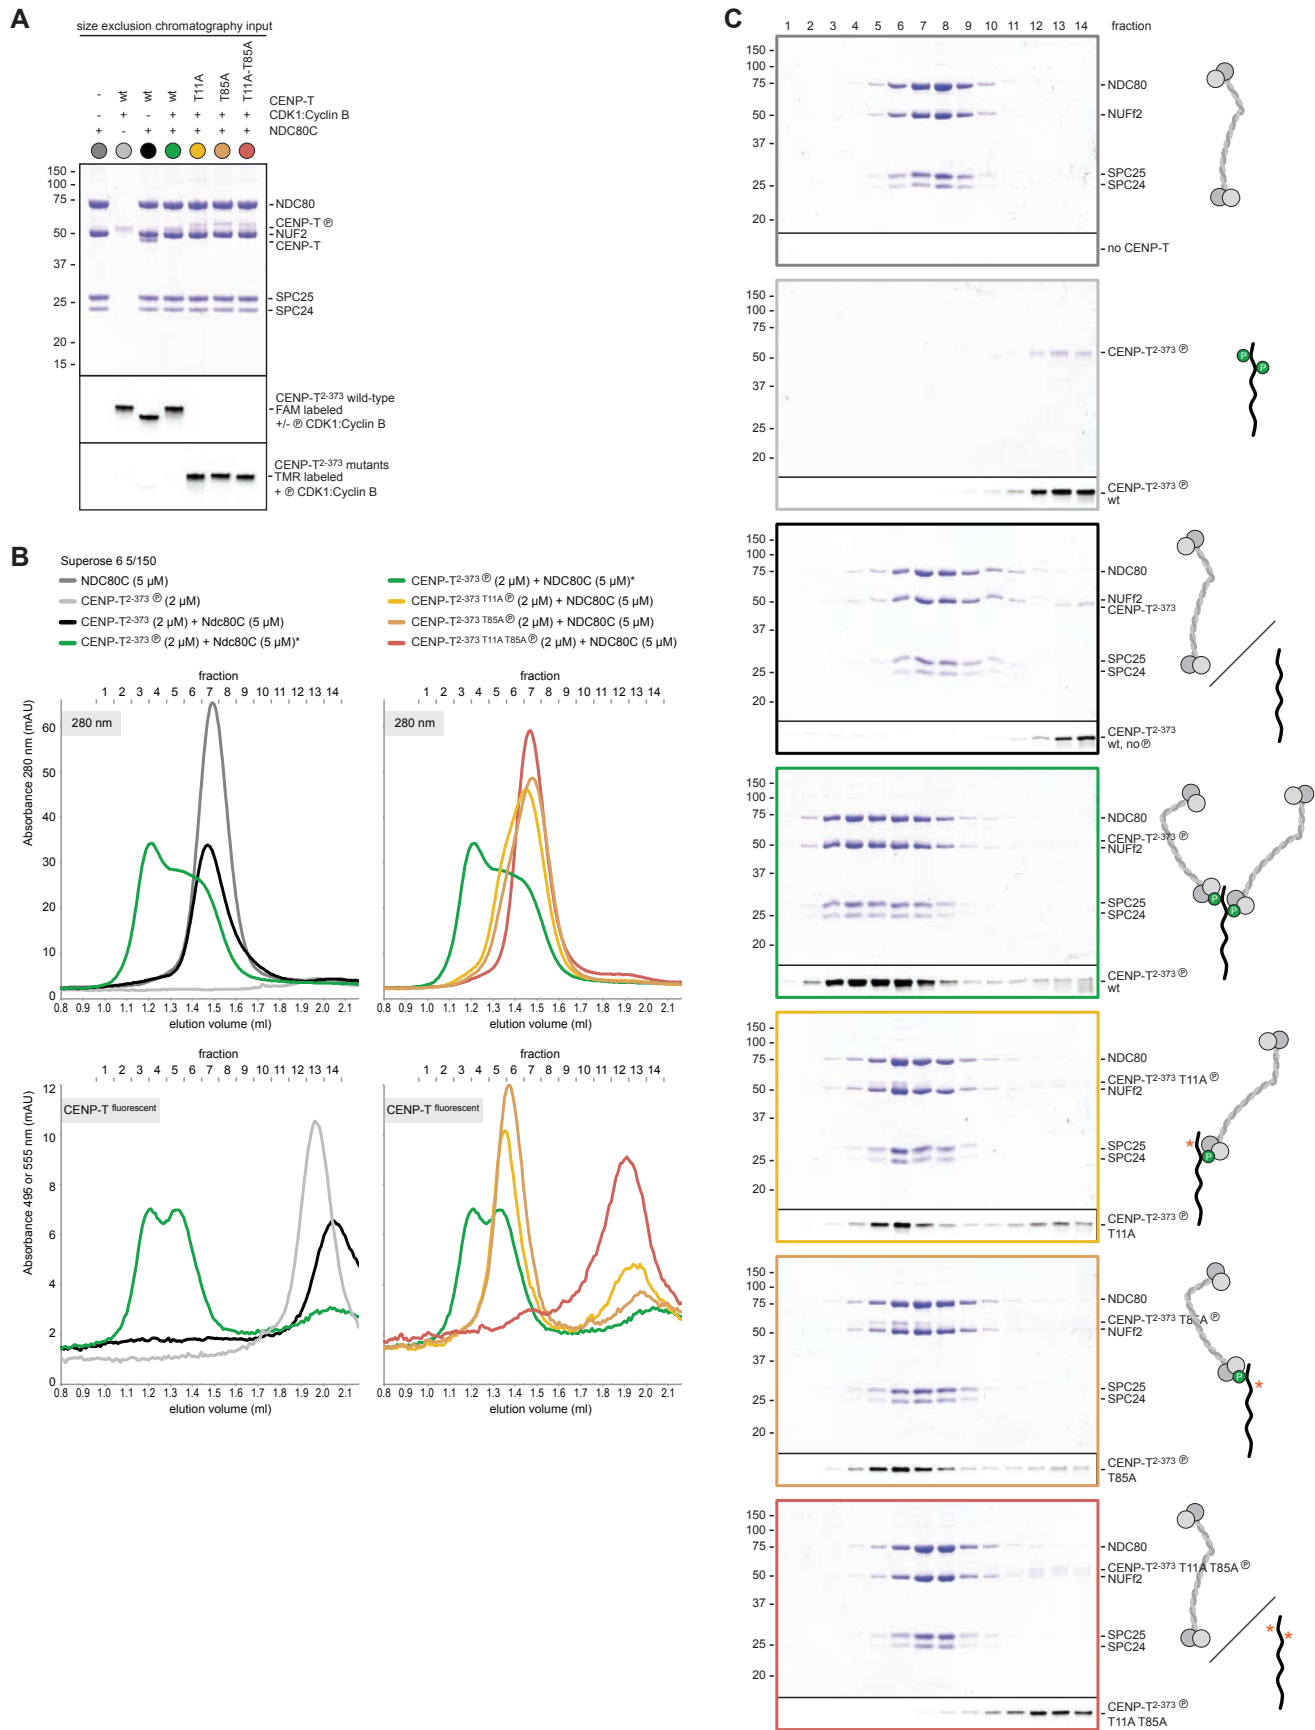

Figure 3 - figure supplement 2. NDC80C gallery and measurements

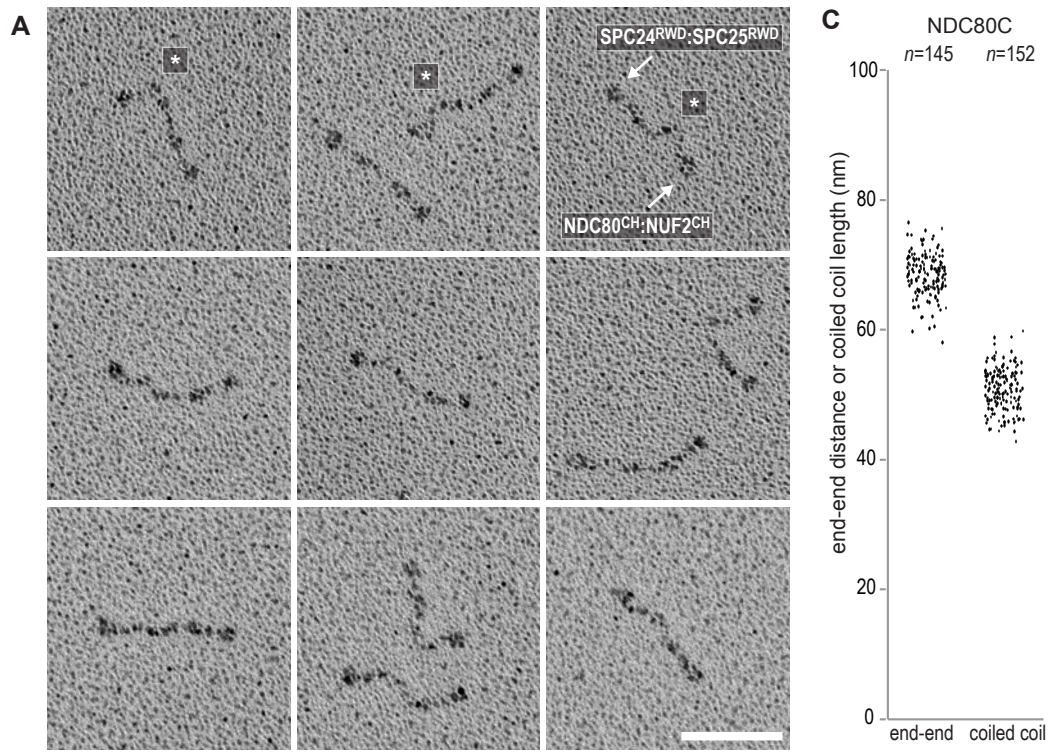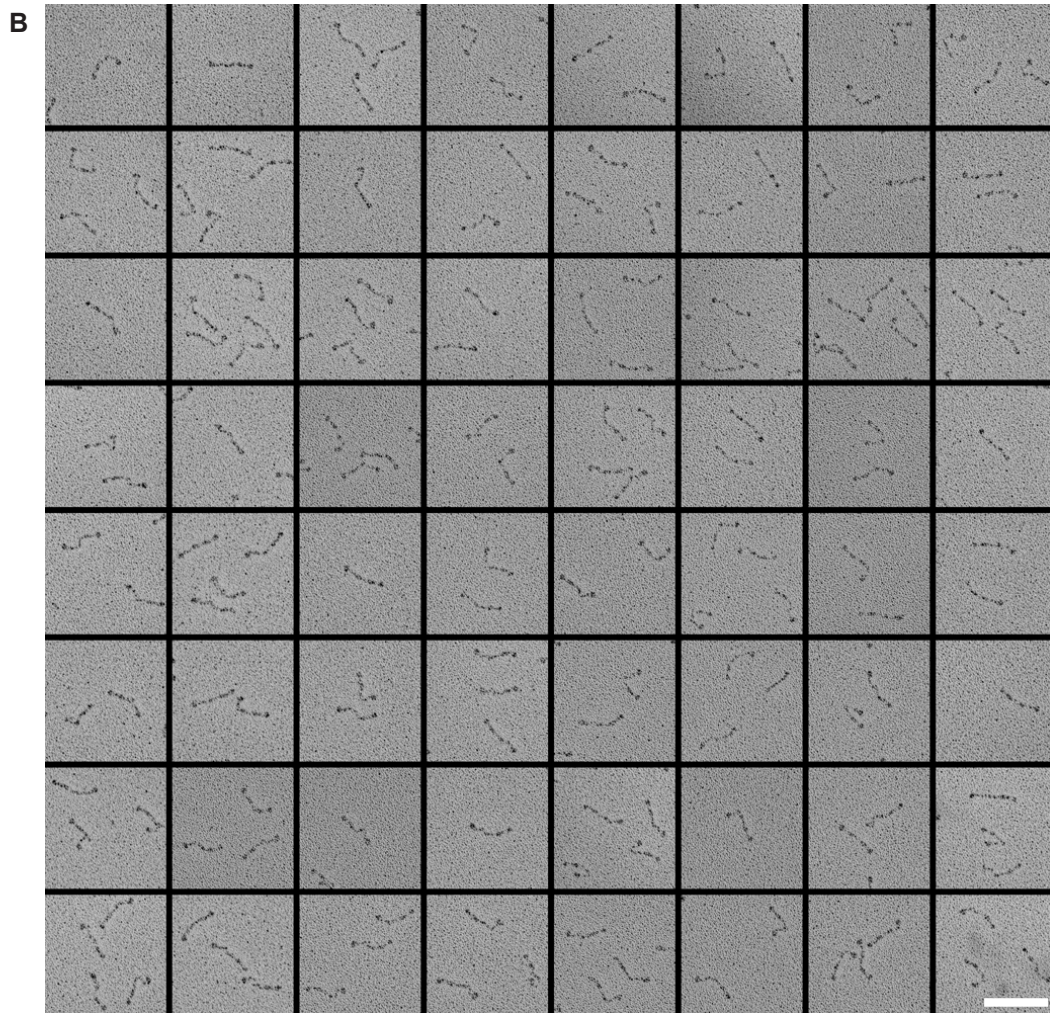

Figure 3 - figure supplement 3. Complex preparation for low-angle metal shadowing and EM

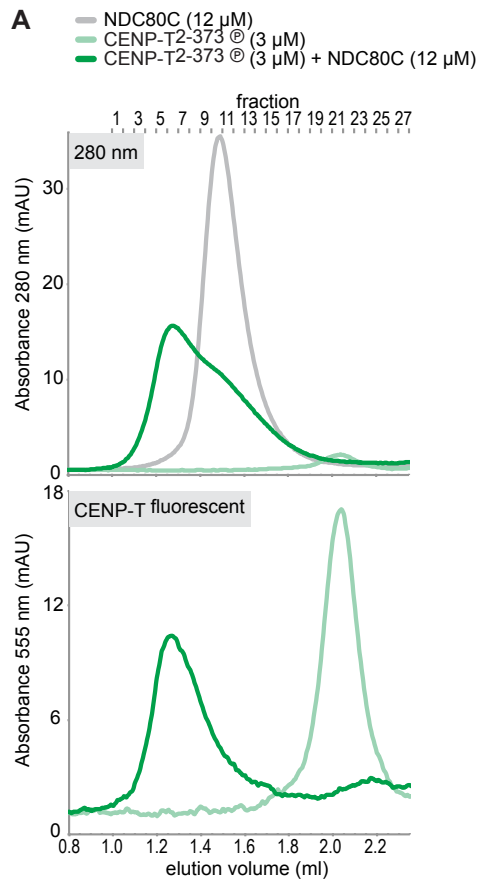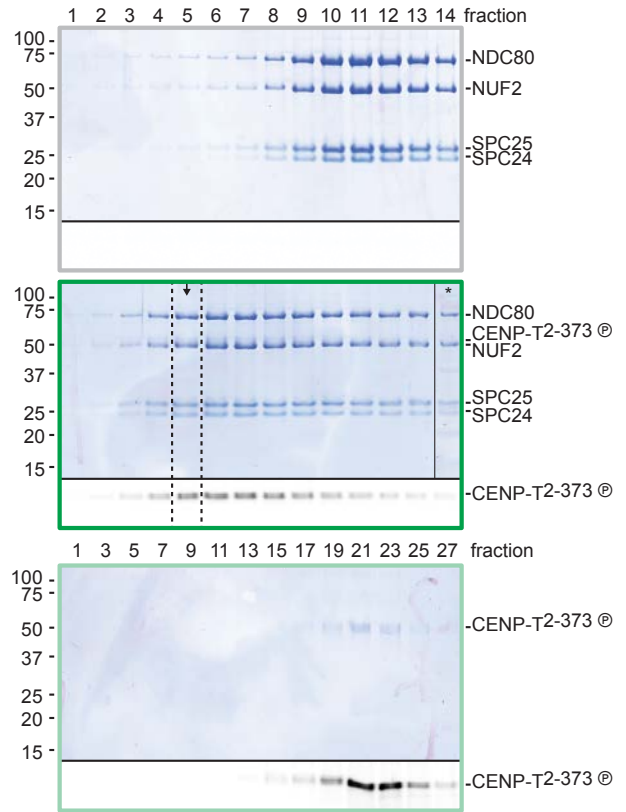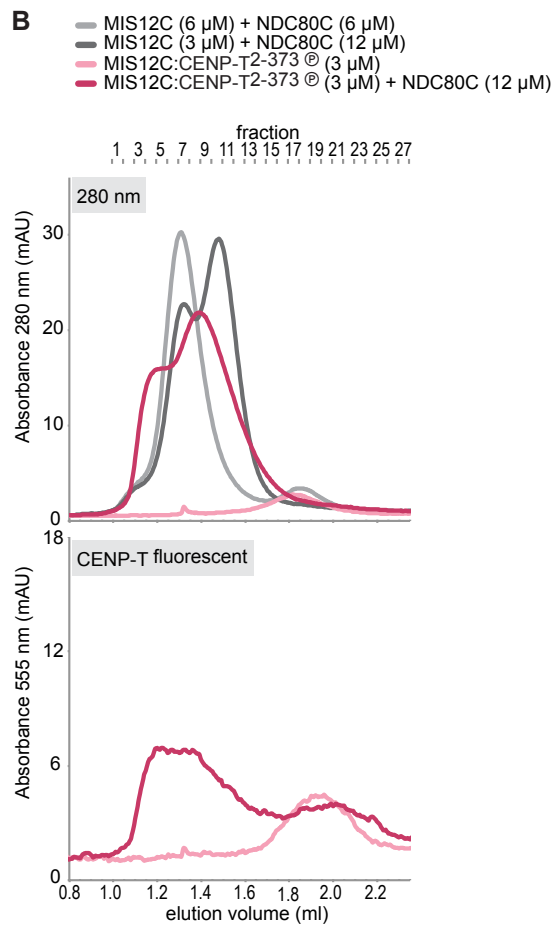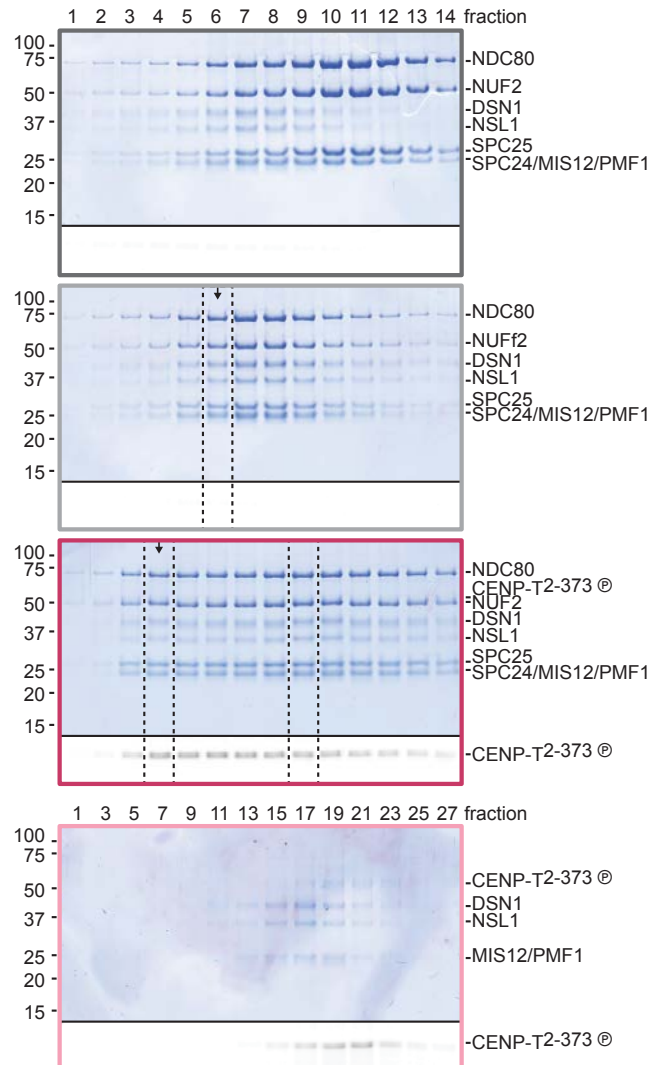

Figure 3 - figure supplement 4. CENP-T:NDC80C2 gallery and measurements

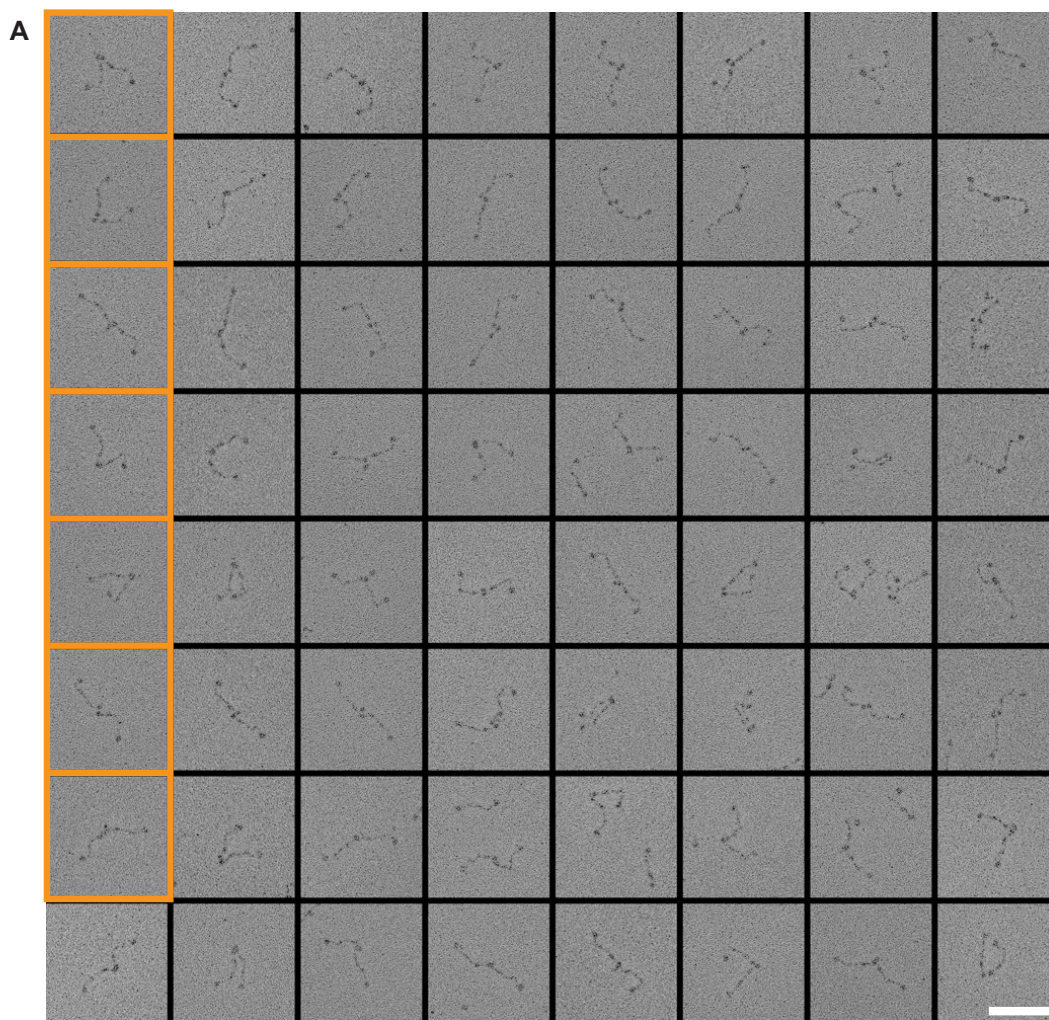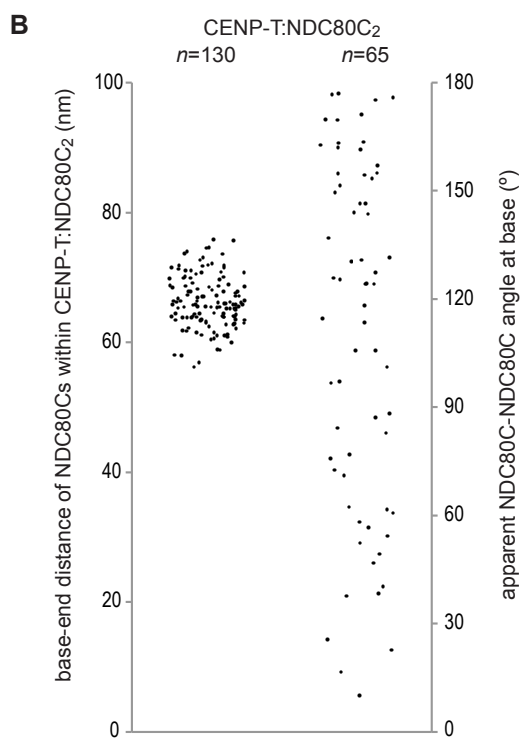

Figure 4 - figure supplement 1. CENP-T phosphorylated by CDK1:Cyclin B at position S201 binds the MIS12 complex

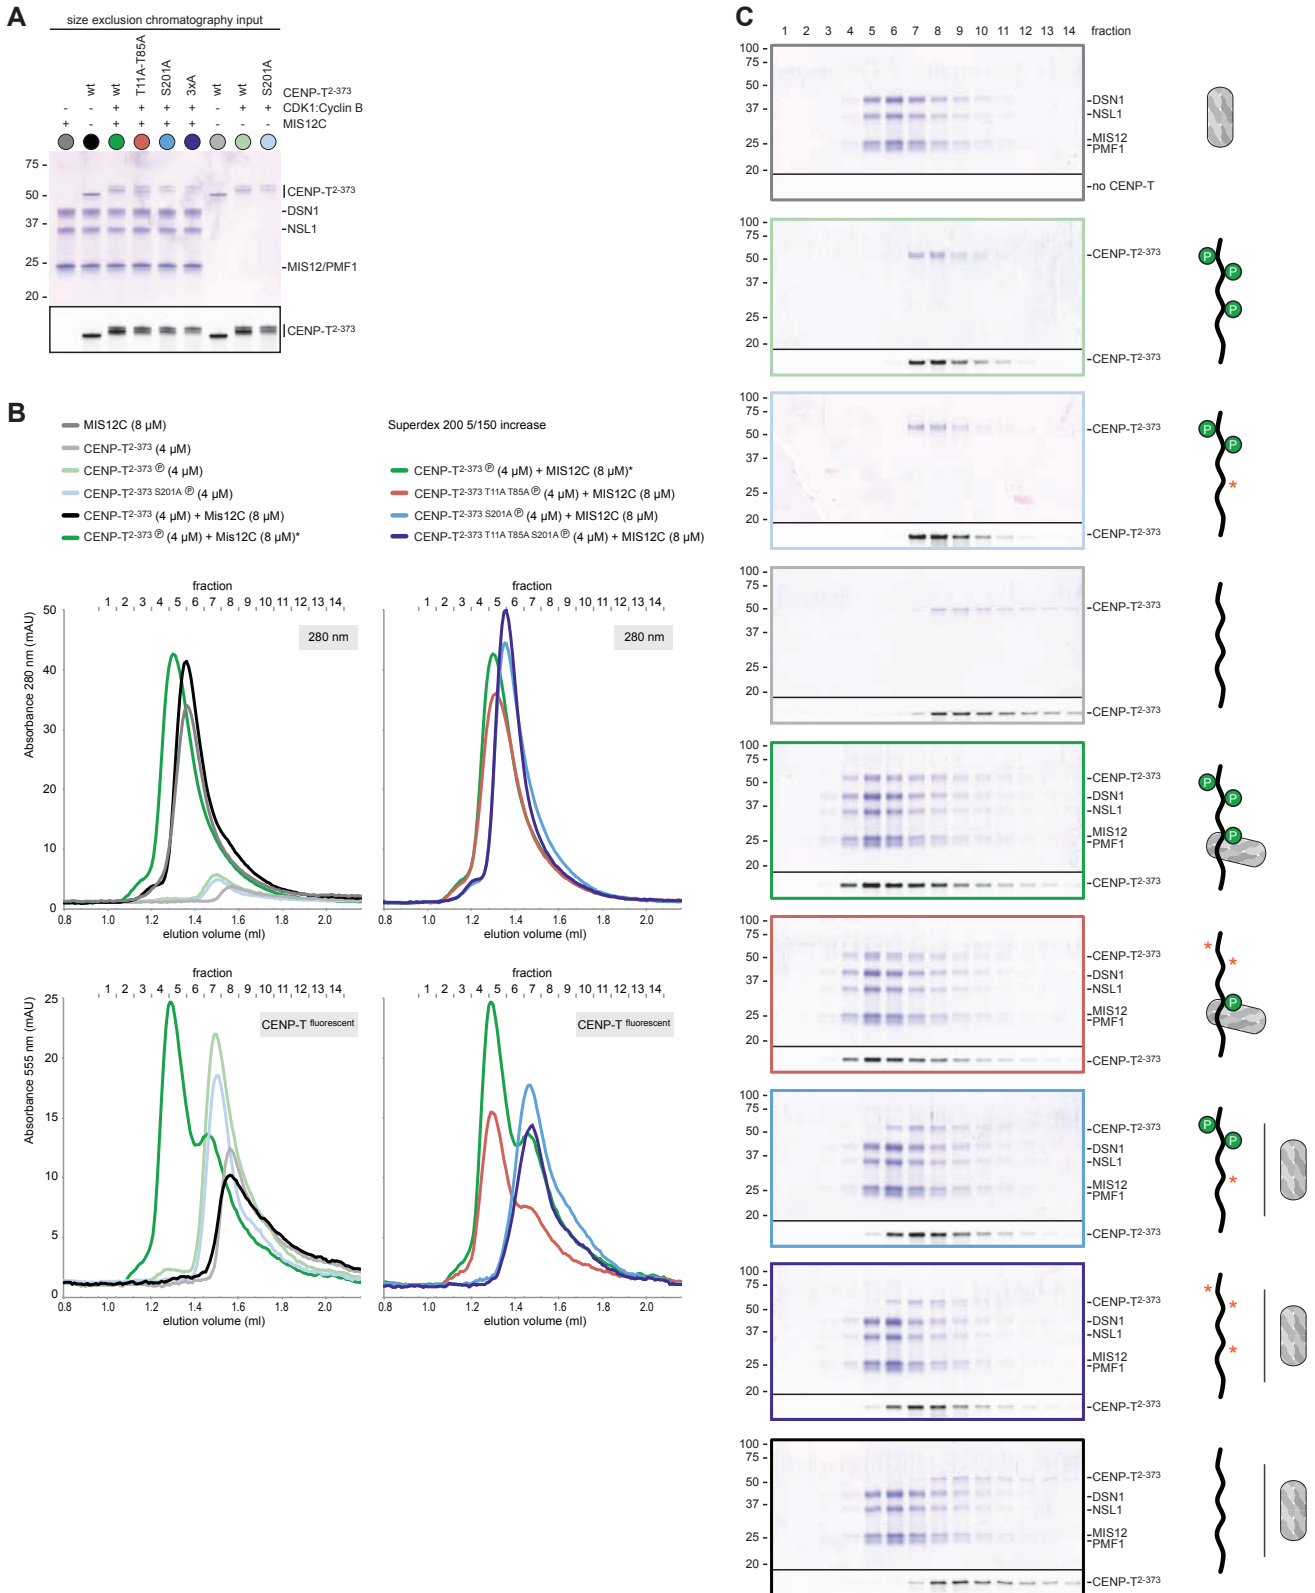



Figure 4 - figure supplement 2. Phosphorylation of CENP-T T195 is not required for MIS12C binding *in vitro*

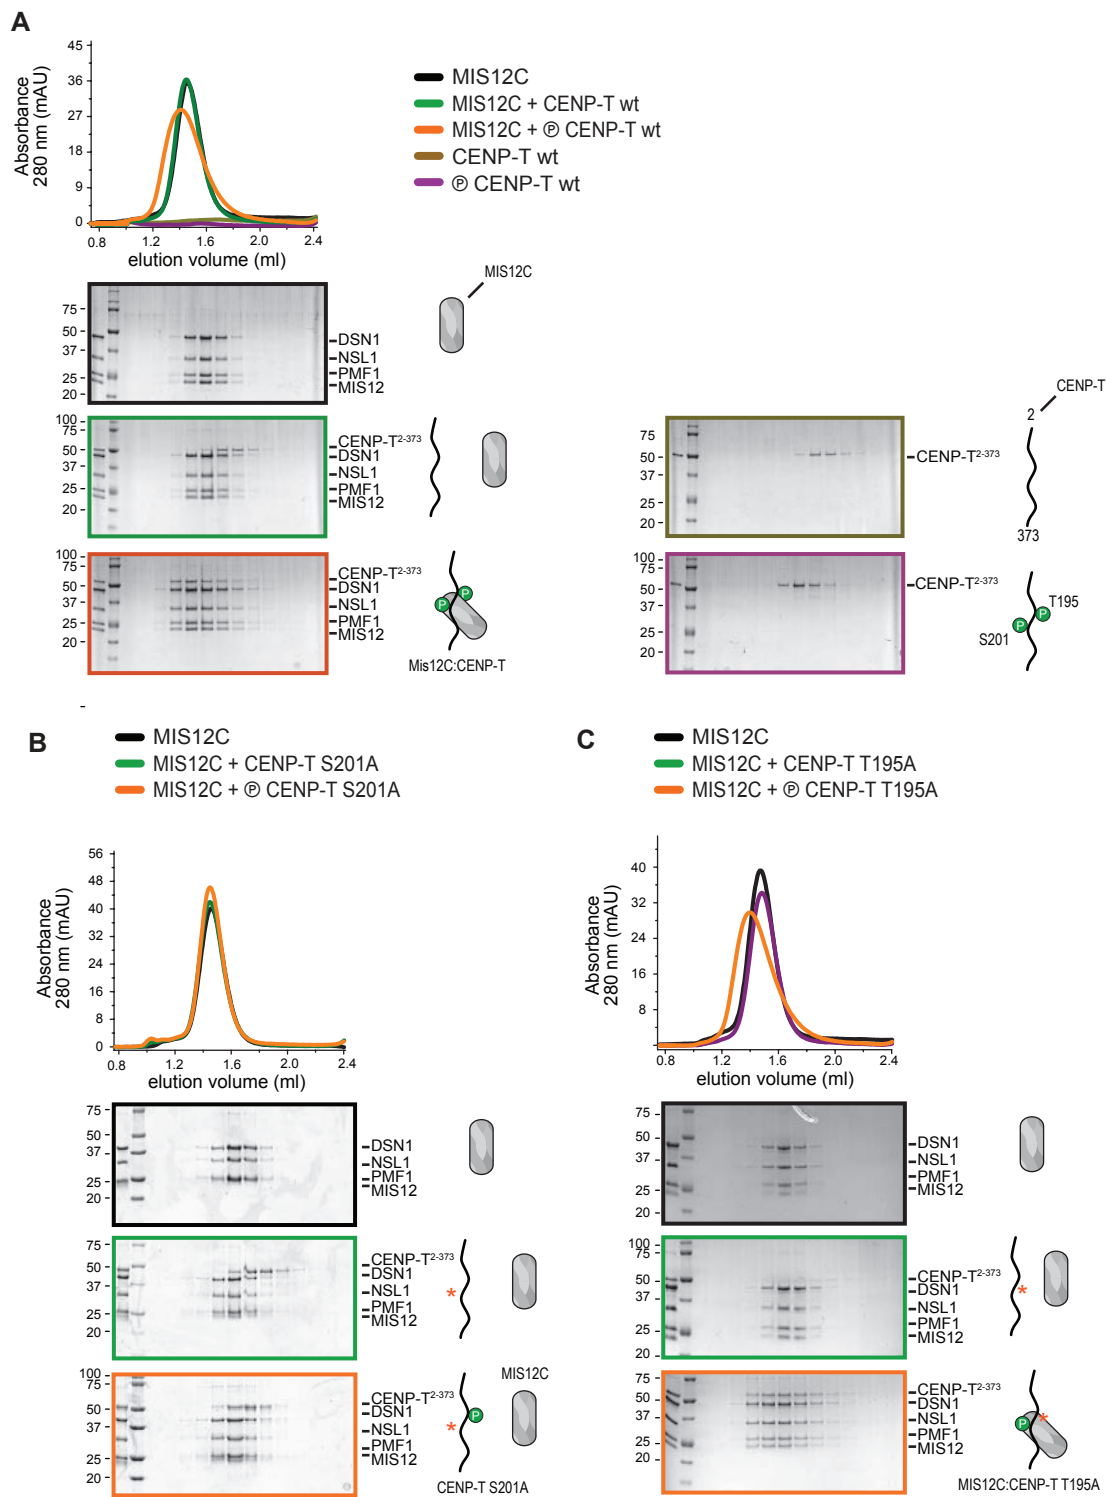

Figure 5 - figure supplement 1. Supercomplex formation depends on the phosphorylation of CENP-T T11, T85, and S201

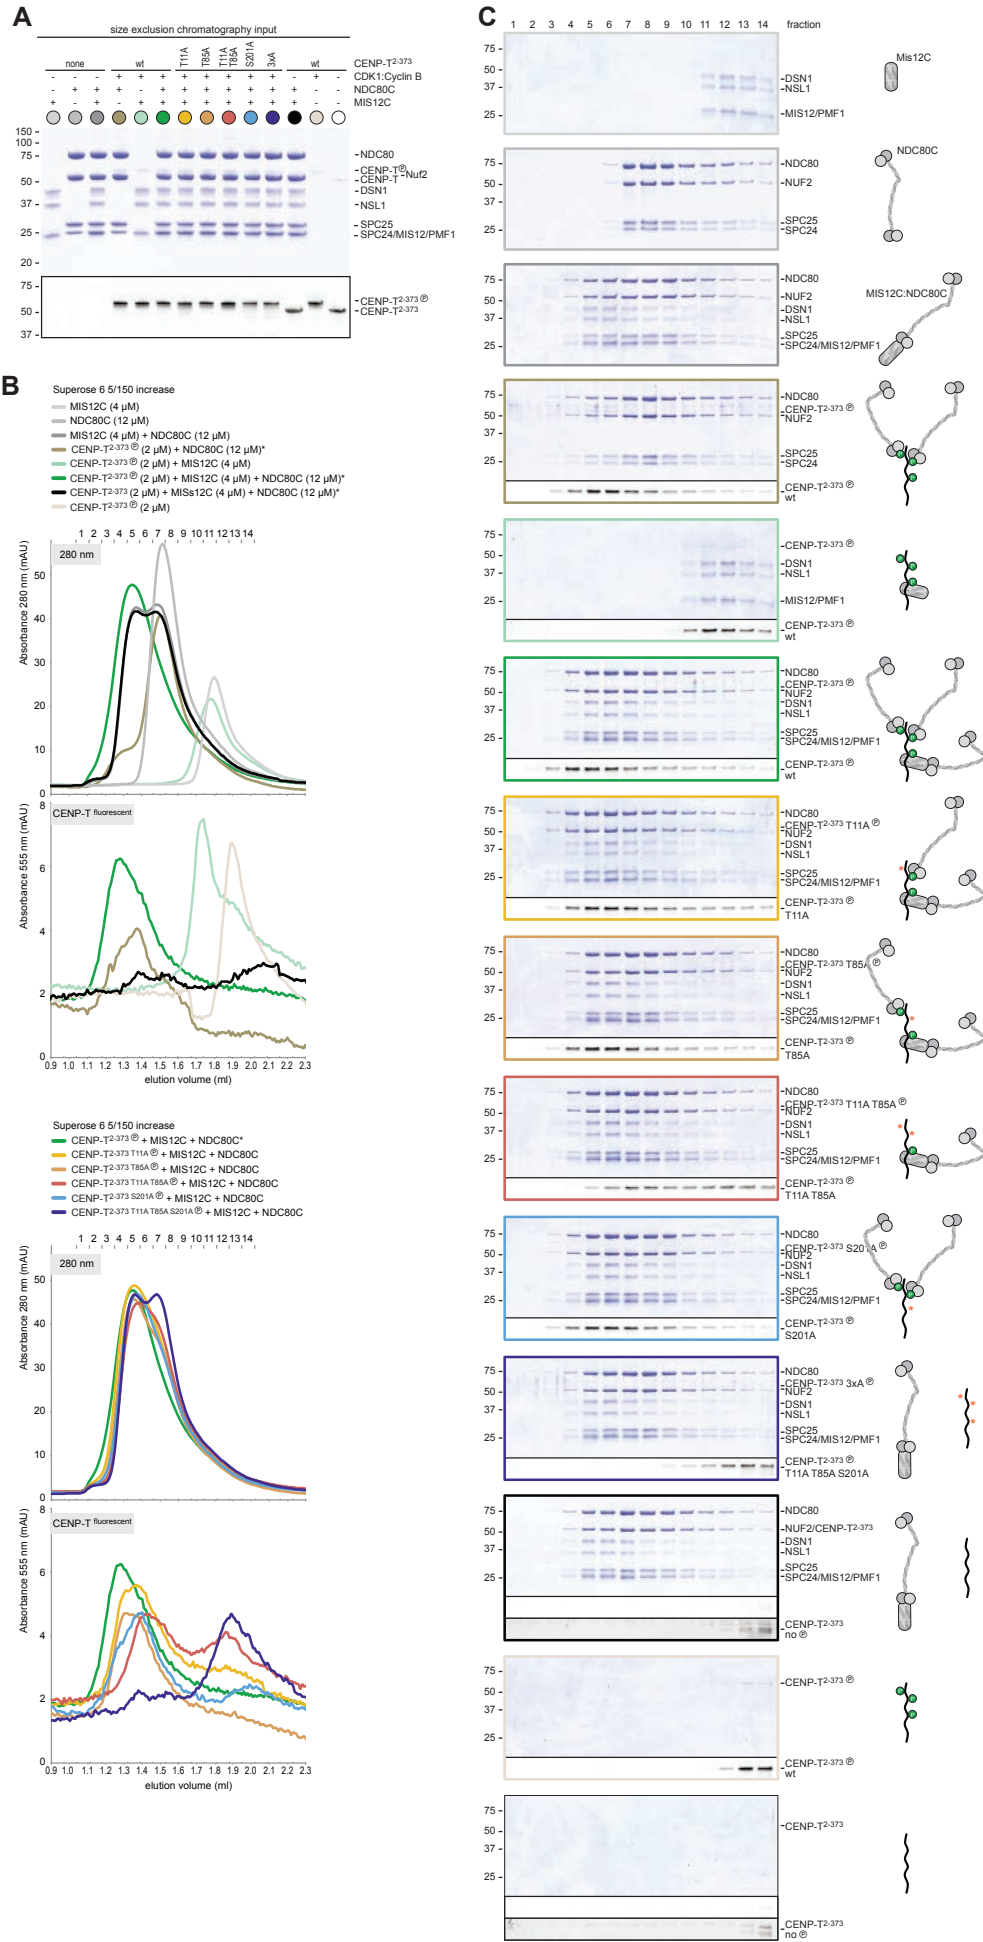

Figure 5 - figure supplement 2. MIS12C:NDC80C gallery and measurements

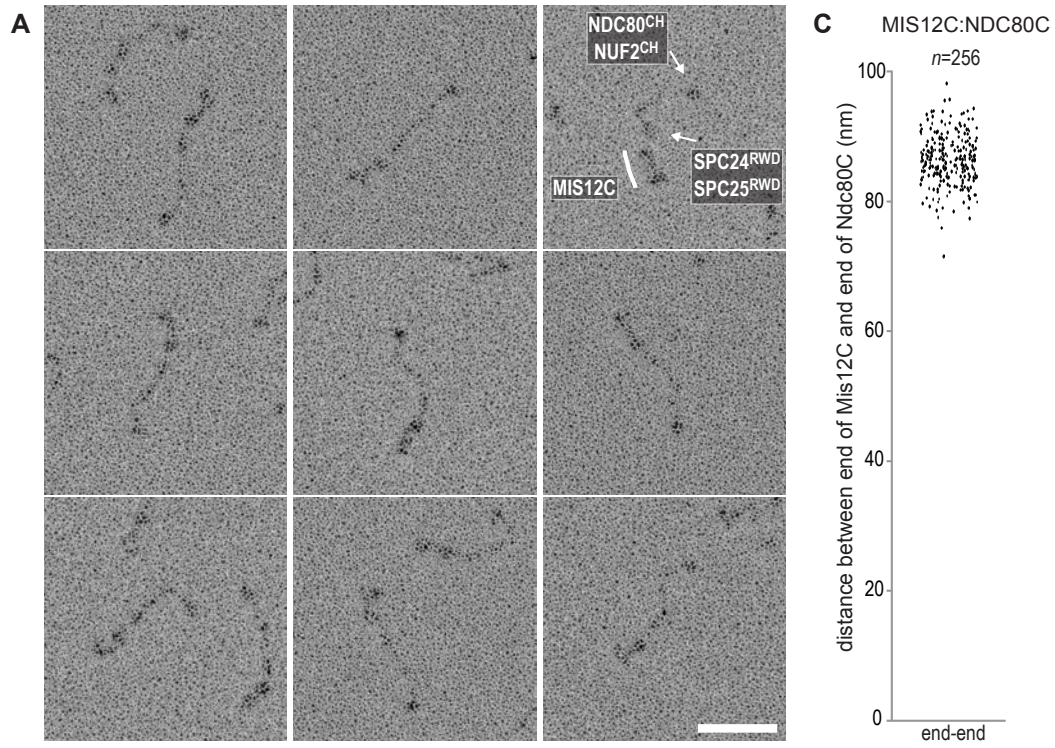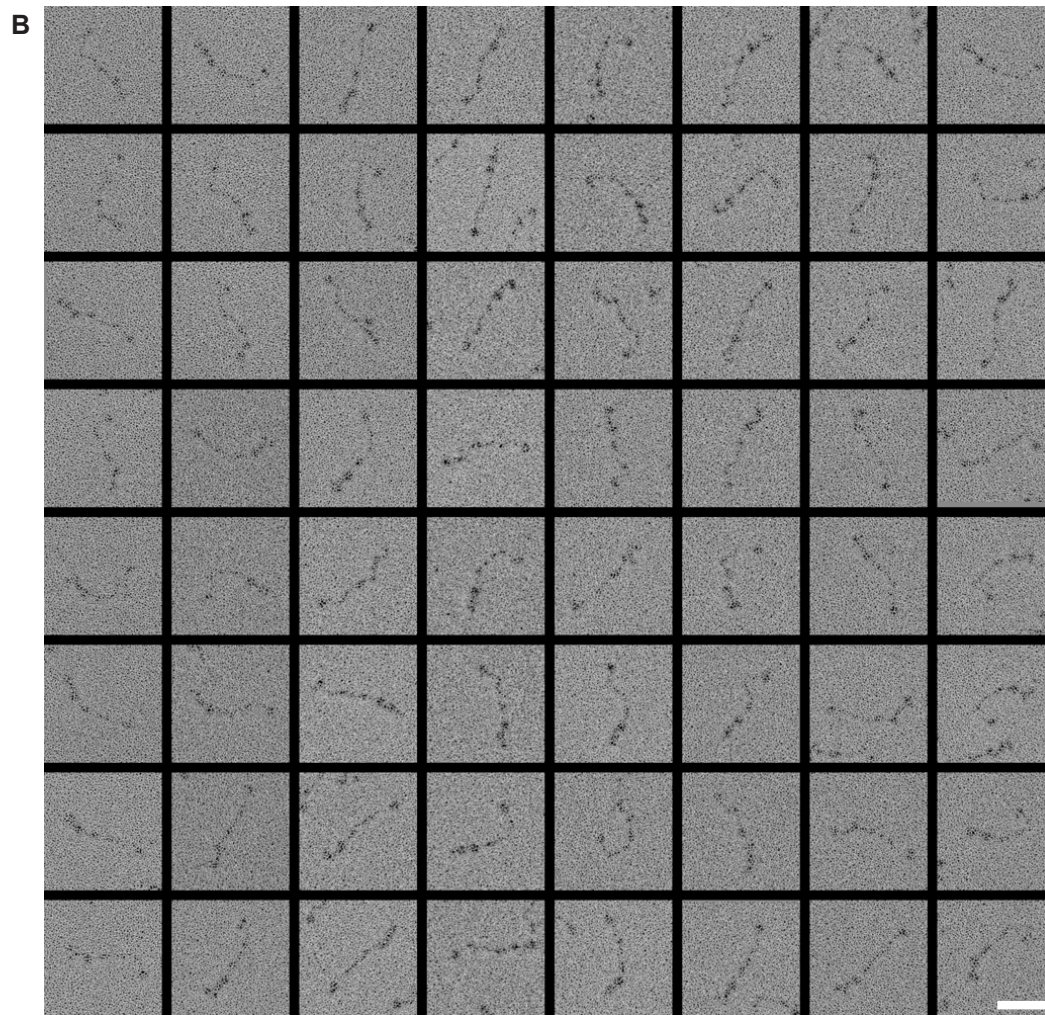

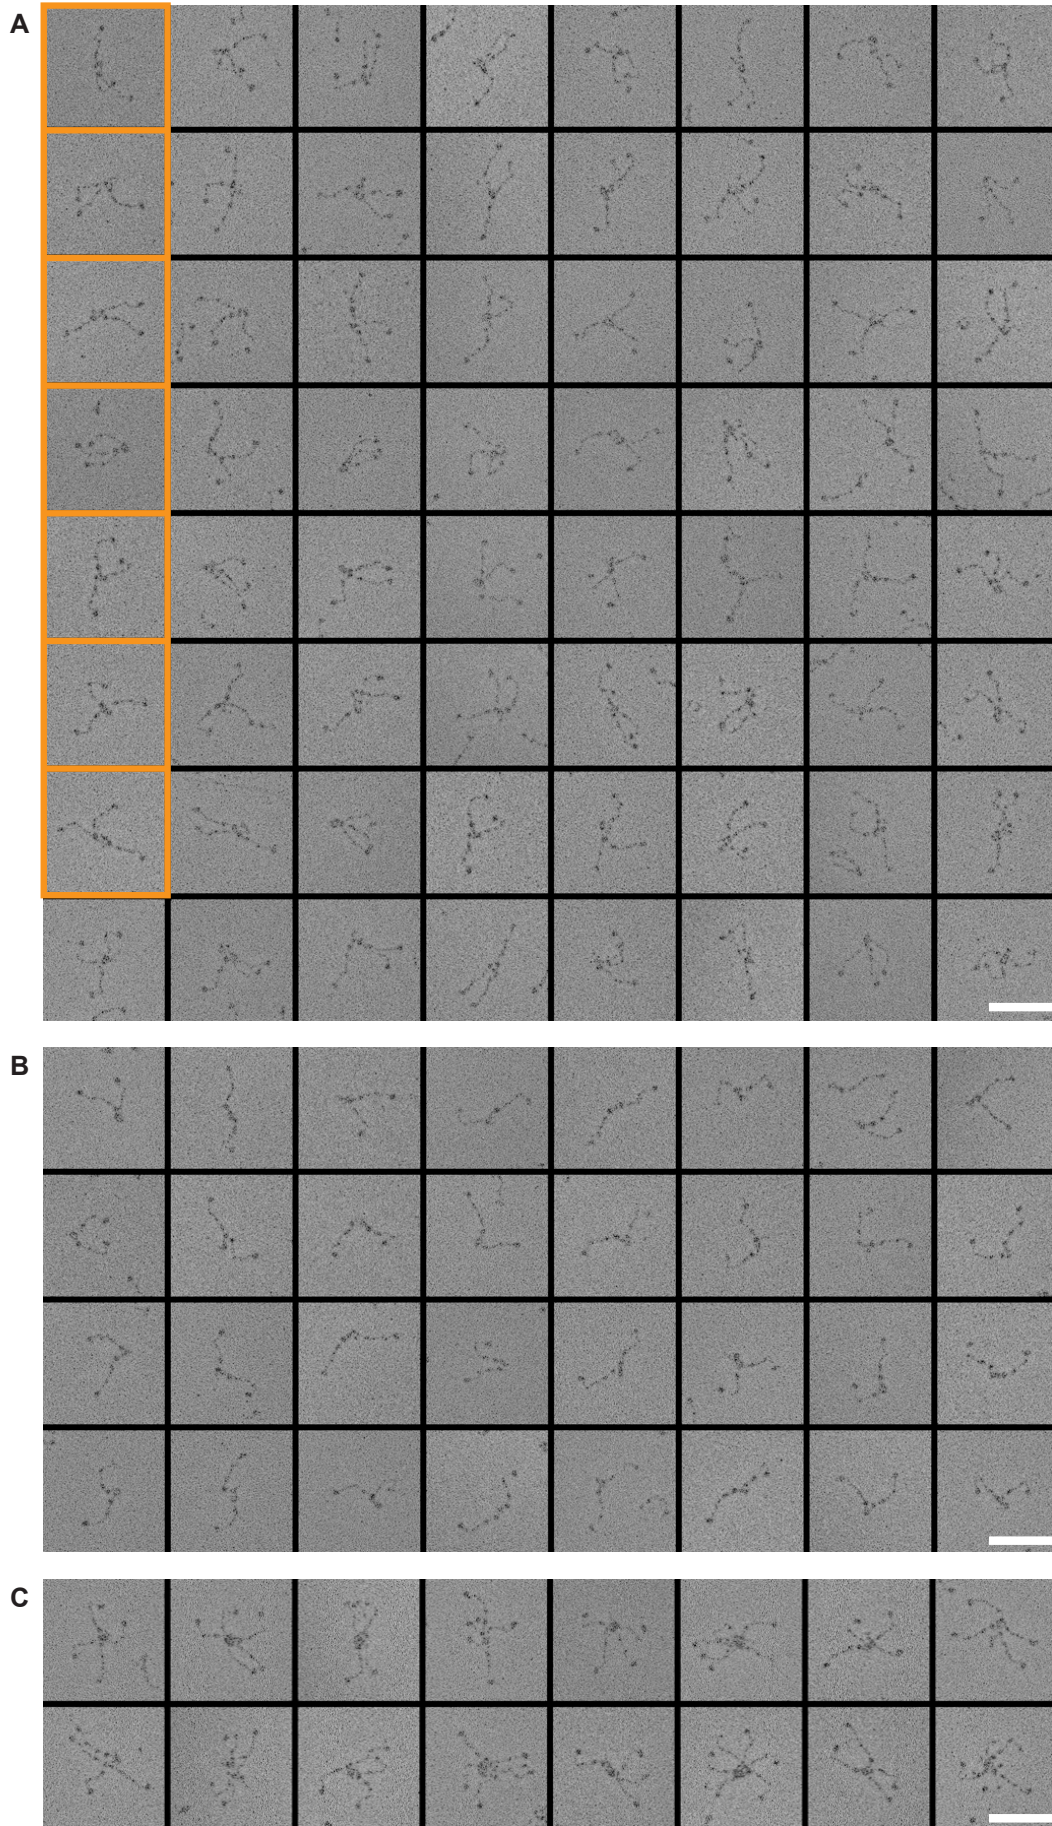

Figure 6 - figure supplement 1. CENP-T and CENP-C are competitive binders of the MIS12 complex

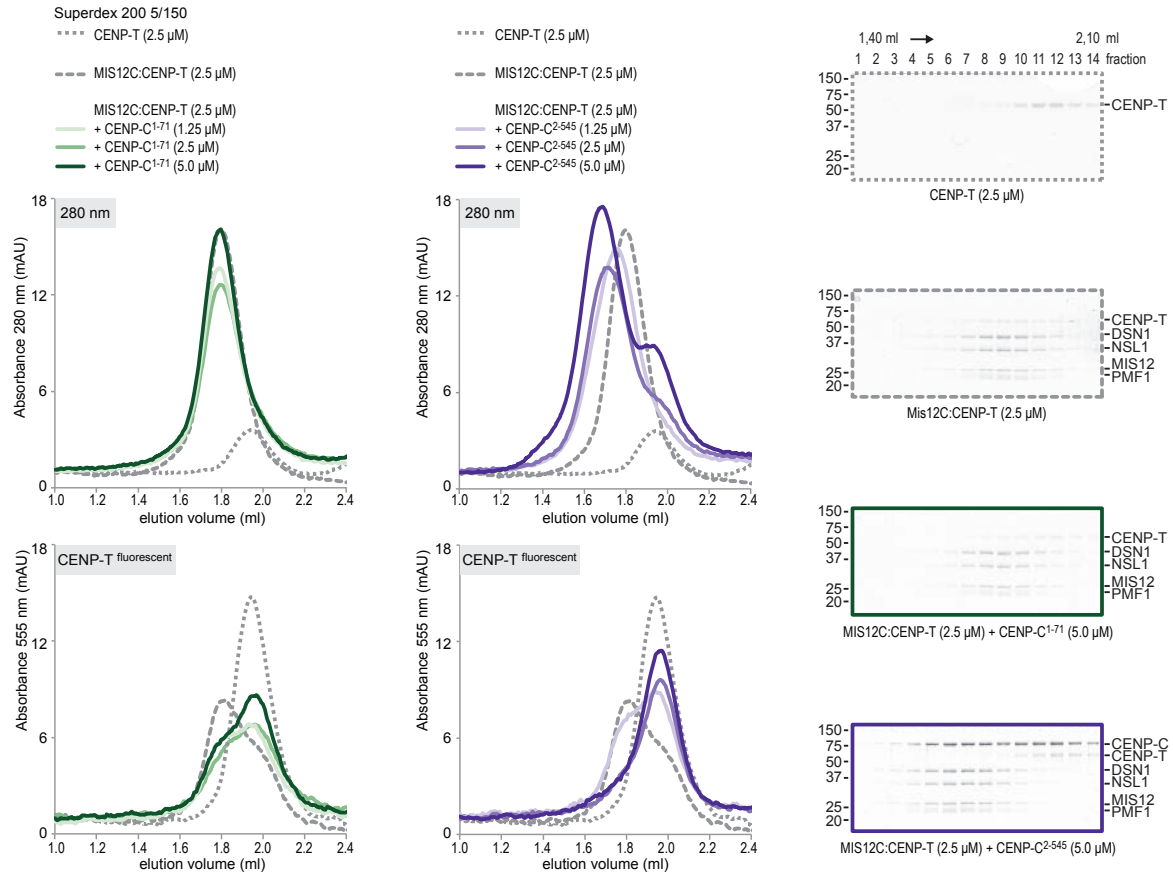

Source: http://www.biorxiv.org/content/10.1101/071613v1.full.pdf
